# Supplementary material for: Mouse mammary stem cells express prognostic markers for triple-negative breast cancer
Source: Breast Cancer Res. 2015 Mar 4;17(1):31. doi: 10.1186/s13058-015-0539-6 (PMC4381533; doi:10.1186/s13058-015-0539-6)
Supplement: Additional file 2: — Primer sequences. TAQMAN Assays-on-Demand references; primer sequences for in-house Sybr Green PCR assays; primer sequences for single cell amplification. [file 13058_2015_539_MOESM2_ESM.xlsx]

## Sheet: Primers
Additional File 2
Taqman Assays on Demand used for Taqman qPCR
Gene Symbol	Assays on demand reference	Unigene ID
Abcg2	Mm00496364_m1	Mm.333096
Actb	Mm00607939_s1	Mm.391967
Areg	Mm00437583_m1	Mm.8039
Bdnf	Mm00432069_m1	Mm.1442
Bmi1	Mm00776122_gH	Mm.289584
Dll1	Mm00432841_m1	Mm.4875
Dmbt1	Mm00455996_m1	Mm.4138
Esr1	Mm00433149_m1	Mm.9213
Fzd1	Mm00445405_s1	Mm.246003
Gapdh	Mm99999915_g1	Mm.304088
Id4	Mm00499701_m1	Mm.458006
Il6	Mm00446190_m1	Mm.1019
Klf4	Mm00516104_m1	Mm.4325
Krt14	Mm00516876_m1	Mm.439898
Krt18	Mm01601702_g1	Mm.22479
Procr	Mm00440992_m1	Mm.3243
Sox6	Mm00488393_m1	Mm.323365
Sparc	Mm00486332_m1	Mm.291442
Ubc	Mm02525934_g1	Mm.331
Wif1	Mm00442355_m1	Mm.32831
Xbp1	Mm00457357_m1	Mm.469937
Primer sequences designed in house for use with Sybr Green qPCR
Gene Symbol	Sequence (primer pair)	Unigene ID
Actb	agcgcaagtactctgtgtgga	Mm.391967
	gggccggactcatcgtact
B2m	gggaagccgaacatactgaa	Mm.163
	tgcttaactctgcaggcgtat
Brca1	ccaaagatgagctggagagg	Mm.244975
	ccaatatctgggcagttgct
Brca2	tgccggactgtgattcagta	Mm.236256
	tacttgctggtctggcctct
Btg2	gatggctccatctgtgtcct	Mm.392646
	ggagacggccatcacatagt
Ccnd1	cagattgaagcccttctgga	Mm.273049
	accagcctcttcctccactt
Ccnb1	tcttgacaacggtgaatgga	Mm.260114
	ctttgtgaggccacagttca
Cdh5	ccaattcctccgactctgac	Mm.21767
	agttcctcctggggatctga
Cdkn1a	ttgcactctggtgtctgagc	Mm.195663
	tctgcgcttggagtgataga
Cdkn2a	cttcctggacacgctggt	Mm.4733
	tcgcacgatgtcttgatgtc
Cdkn1b	agtcagcgcaagtggaattt	Mm.2958
	agtagaactcgggcaagctg
Chek1	tccgactttctaagggtgatg	Mm.16753
	accttctggctgctcacaac
Gapdh	tgcgacttcaacagcaactc	Mm.304088
	atgtaggccatgaggtccac
Gfra2	tcagcccagggagtaaaaag	Mm.32619
	ccaaggtcaccatcaggagt
Krt15	tggctggtattggtgtcaga	Mm.440010
	ccatccactgattcctccac
Lgals1	ctgccagacggacatgaat	Mm.43831
	aggccacgcacttaatcttg
Lgr5	ctttacccacgccagcatag	Mm.42103
	tgggacaaatgcaactgaag
Nfatc1	tccctggtggttgagatacc	Mm.329560
	gaaacgctggtactggcttc
Pcna	tcacaaaagccactccactg	Mm.7141
	tgtcccatgtcagcaatttt
Pdgfb	tcaagctcgggtgacca	Mm.144089
	ctccgagggtctccttcag
Phf3	gatgggaaagcaagcagaga	Mm.194486
	gtggtccctgtctttgtggt
Ppia	agcatacaggtcctggcatc	Mm.5246
	agctgtccacagtcggaaat
Prkcq	aagtgagaaaccccggctat	Mm.329993
	tctccatccctgggttaatg
Prox1	agttgcgcagatcacgttac	Mm.132579
	atccagcttgcagatgacct
Ptprb	acatttatggggcagtgcat	Mm.37213
	gttccgcagtttctttgctc
Ptprz1	tagtcctcagcctcgtcagc	Mm.41639
	aaagattccaggctttcagc
Tnc	aacctgatgggcagatatgg	Mm.454219
	tccagatttcggaagttgct
Ubc	agcccagtgttaccaccaag	Mm.331
	tcacacccaagaacaagcac
Vim	ttgacacccactcaaaaagaa	Mm.268000
	tattcaaggtcatcgtgatgct
Zeb1	gatggtacagtggaggttgga	Mm.3929
	cagacagctgctcactctcg
Zeb2	tacggatcccgaaacgatac	Mm.440702
Table 2.8 Primer sequences used for single cell cDNA amplification
Primer	Sequence
MO4d(T)	AAG CAG TGG TAT CAA CGC AGA GTG GCC ATT ACG GCC GTA CTT TTT TTT TTT TTT TTT TTT TTT TTT TTT T
T7-MO4	GGCCAGTGAATTGTAATACGACTCACTATAGGGAGGCGGAAGCAGTGGTATCAACGCAGAGTGGCCATTACGGCCGTAC
