# Supplementary material for: Mouse mammary stem cells express prognostic markers for triple-negative breast cancer
Source: Breast Cancer Res. 2015 Mar 4;17(1):31. doi: 10.1186/s13058-015-0539-6 (PMC4381533; doi:10.1186/s13058-015-0539-6)
Supplement: Additional file 8: — Gene Ontology (GO) and Pathway analysis of MaSC-specific genes. [file 13058_2015_539_MOESM8_ESM.xlsx]

## Sheet: DAVID GO Analysis
Additional file 8 MaSC signature analysis
Annotation Cluster 1	Metacluster	Enrichment Score: 4.290927115790648
Category		Term	Count	%	PValue	Genes	List Total	Pop Hits	Pop Total	Fold Enrichment	Bonferroni	Benjamini	FDR
GOTERM_BP_FAT	Cell adhesion	GO:0007155~cell adhesion	27	8.33333	2.67448e-06	NRP2, DLC1, AEBP1, EMCN, IGFBP7, TNC, CLDN5, POSTN, CDH5, CD93, TEK, COL6A2, COL12A1, COL6A1, COL18A1, LGALS1, COL15A1, SDK1, PCDH7, THY1, CDH13, CD36, PECAM1, CNTN2, ADAM12, DST, CHL1	229	561	13588	2.85576	0.00364934	0.00121793	0.00439373
GOTERM_BP_FAT		GO:0022610~biological adhesion	27	8.33333	2.76498e-06	NRP2, DLC1, AEBP1, EMCN, IGFBP7, TNC, CLDN5, POSTN, CDH5, CD93, TEK, COL6A2, COL12A1, COL6A1, COL18A1, LGALS1, COL15A1, SDK1, PCDH7, THY1, CDH13, CD36, PECAM1, CNTN2, ADAM12, DST, CHL1	229	562	13588	2.85067	0.00377259	0.000944485	0.00454241
GOTERM_BP_FAT		GO:0016337~cell-cell adhesion	10	3.08642	0.0181255	CDH13, EMCN, CD93, LGALS1, CLDN5, TEK, PCDH7, CHL1, CDH5, THY1	229	236	13588	2.51425	1	0.303988	25.9559
Annotation Cluster 2		Enrichment Score: 4.084891015544971
Category		Term	Count	%	PValue	Genes	List Total	Pop Hits	Pop Total	Fold Enrichment	Bonferroni	Benjamini	FDR
GOTERM_BP_FAT	Cytoskeletal organisation	GO:0030029~actin filament-based process	13	4.01235	4.17702e-05	DLC1, FOXJ1, ARHGEF17, PROX1, DAAM2, CORO1C, GSN, LIMCH1, MYH11, WIPF1, DIAP2, AKAP2, MYH10	229	176	13588	4.38279	0.0555014	0.00711223	0.0686011
GOTERM_BP_FAT		GO:0030036~actin cytoskeleton organization	12	3.7037	0.000106868	CORO1C, DLC1, FOXJ1, GSN, LIMCH1, MYH11, ARHGEF17, DIAP2, PROX1, DAAM2, AKAP2, MYH10	229	165	13588	4.31536	0.135925	0.0121008	0.175425
GOTERM_BP_FAT		GO:0007010~cytoskeleton organization	17	5.24691	0.000124628	DLC1, FOXJ1, ARHGEF17, DAAM2, PROX1, THY1, CORO1C, GSN, LIMCH1, MTAP1B, MYH11, MTAP7, DIAP2, DST, AKAP2, SGCB, MYH10	229	326	13588	3.09422	0.156653	0.012096	0.20455
Annotation Cluster 3		Enrichment Score: 3.509962039082752
Category		Term	Count	%	PValue	Genes	List Total	Pop Hits	Pop Total	Fold Enrichment	Bonferroni	Benjamini	FDR
GOTERM_BP_FAT	Transcription and transcriptional regulation	GO:0045449~regulation of transcription	65	20.0617	5.43049e-06	NKAP, AEBP1, NAA15, ZXDB, ZEB2, ANKRD1, ZFP84, ESF1, S1PR1, WWP1, TRAK1, ANP32A, LRRFIP1, NR2F2, DNAJC2, SOX10, FOXJ1, CDC5L, PROX1, PRKCQ, RFC1, MTF1, ZFP462, BPTF, DNTTIP2, THAP7, CAMTA1, TSHZ3, TSHZ2, NFIX, MYBL1, ELK3, ZFP319, ZFP316, NR1D1, CENPB, BCL11B, HNRNPD, PER2, BCOR, NFATC2, TCF4, RUNX2, CHD4, EWSR1, NFATC1, MLLT3, ERG, EPAS1, POLR3K, KLF12, AFF3, TRIM24, ZFP148, ATRX, NUP62, DBP, EB…	229	2227	13588	1.73186	0.00739602	0.0014836	0.00892124
GOTERM_BP_FAT		GO:0006350~transcription	51	15.7407	0.000127378	AEBP1, NAA15, ZXDB, ZEB2, ZFP84, ESF1, ANP32A, LRRFIP1, NR2F2, SOX10, FOXJ1, CDC5L, PROX1, MTF1, RFC1, DNTTIP2, CAMTA1, TSHZ3, THAP7, TSHZ2, NFIX, ELK3, MYBL1, ZFP319, ZFP316, NR1D1, BCL11B, PER2, HNRNPD, BCOR, NFATC2, TCF4, RUNX2, EWSR1, CHD4, MLLT3, NFATC1, ERG, POLR3K, KLF12, EPAS1, AFF3, ZFP148, TRIM24, DBP, EBF3, GTF2F1, IFT57, PBX1, NFIC, ZFHX3	229	1772	13588	1.70776	0.159818	0.011542	0.20906
GOTERM_BP_FAT		GO:0051252~regulation of RNA metabolic process	40	12.3457	0.00312305	NKAP, TSHZ3, TSHZ2, AEBP1, ZEB2, NFIX, ELK3, ANKRD1, ZFP84, ZFP316, S1PR1, NR1D1, BCL11B, TRAK1, PER2, HNRNPD, NFATC2, BCOR, TCF4, NR2F2, RUNX2, MLLT3, NFATC1, SOX10, ERG, EPAS1, KLF12, FOXJ1, ZFP148, TRIM24, ATRX, ZFP462, MTF1, BPTF, DBP, EBF3, PBX1, NFIC, ZFHX3, DNAJB5	229	1488	13588	1.59506	0.9861	0.115001	5.009
GOTERM_BP_FAT		GO:0006355~regulation of transcription, DNA-dependent	39	12.037	0.00422318	NKAP, TSHZ3, TSHZ2, AEBP1, ZEB2, NFIX, ELK3, ANKRD1, ZFP84, ZFP316, S1PR1, NR1D1, BCL11B, TRAK1, PER2, NFATC2, BCOR, TCF4, NR2F2, RUNX2, MLLT3, NFATC1, SOX10, ERG, KLF12, EPAS1, FOXJ1, ZFP148, TRIM24, ATRX, ZFP462, MTF1, BPTF, DBP, EBF3, PBX1, NFIC, ZFHX3, DNAJB5	229	1465	13588	1.5796	0.996928	0.131602	6.71663
Annotation Cluster 4		Enrichment Score: 3.1547803957249085
Category		Term	Count	%	PValue	Genes	List Total	Pop Hits	Pop Total	Fold Enrichment	Bonferroni	Benjamini	FDR
GOTERM_BP_FAT	Cytoskeletal organisation	GO:0051493~regulation of cytoskeleton organization	12	3.7037	8.04373e-07	S1PR1, GSN, SPNB2, MTAP4, MTAP1B, CLASP1, MAPRE1, NEXN, PROX1, DST, KANK2, APC	229	99	13588	7.19227	0.00109897	0.00109897	0.00132147
GOTERM_BP_FAT		GO:0051494~negative regulation of cytoskeleton organization	9	2.77778	1.17645e-06	S1PR1, GSN, SPNB2, MTAP4, MTAP1B, CLASP1, MAPRE1, KANK2, APC	229	48	13588	11.1255	0.00160692	0.000803783	0.00193274
GOTERM_BP_FAT		GO:0010639~negative regulation of organelle organization	9	2.77778	8.61442e-06	S1PR1, GSN, SPNB2, MTAP4, MTAP1B, CLASP1, MAPRE1, KANK2, APC	229	62	13588	8.61333	0.0117069	0.00196074	0.0141515
GOTERM_BP_FAT		GO:0051129~negative regulation of cellular component organization	10	3.08642	2.54971e-05	S1PR1, GSN, SPNB2, MTAP4, MTAP1B, CLASP1, MAPRE1, KANK2, APC, THY1	229	93	13588	6.38024	0.0342545	0.0049669	0.0418802
GOTERM_BP_FAT		GO:0033043~regulation of organelle organization	12	3.7037	5.71833e-05	S1PR1, GSN, SPNB2, MTAP4, MTAP1B, CLASP1, MAPRE1, NEXN, PROX1, DST, KANK2, APC	229	154	13588	4.6236	0.0751944	0.00864814	0.0939034
GOTERM_BP_FAT		GO:0031110~regulation of microtubule polymerization or depolymerization	6	1.85185	9.12904e-05	MTAP4, MTAP1B, CLASP1, MAPRE1, DST, APC	229	28	13588	12.7149	0.117326	0.0124024	0.149873
GOTERM_BP_FAT		GO:0031111~negative regulation of microtubule polymerization or depolymerization	5	1.54321	0.000119916	MTAP4, MTAP1B, CLASP1, MAPRE1, APC	229	16	13588	18.5426	0.151203	0.0125312	0.196825
GOTERM_BP_FAT		GO:0043242~negative regulation of protein complex disassembly	6	1.85185	0.000274066	GSN, SPNB2, MTAP4, MTAP1B, CLASP1, APC	229	35	13588	10.1719	0.312504	0.0218	0.449304
GOTERM_BP_FAT		GO:0070507~regulation of microtubule cytoskeleton organization	6	1.85185	0.000313961	MTAP4, MTAP1B, CLASP1, MAPRE1, DST, APC	229	36	13588	9.88937	0.349005	0.0235653	0.514551
GOTERM_BP_FAT		GO:0043244~regulation of protein complex disassembly	6	1.85185	0.000728816	GSN, SPNB2, MTAP4, MTAP1B, CLASP1, APC	229	43	13588	8.27948	0.630888	0.0424073	1.19064
GOTERM_BP_FAT		GO:0032886~regulation of microtubule-based process	6	1.85185	0.00090024	MTAP4, MTAP1B, CLASP1, MAPRE1, DST, APC	229	45	13588	7.9115	0.708053	0.0462495	1.46875
GOTERM_BP_FAT		GO:0031114~regulation of microtubule depolymerization	4	1.23457	0.00148021	MTAP4, MTAP1B, CLASP1, APC	229	14	13588	16.9532	0.867999	0.0722546	2.40422
GOTERM_BP_FAT		GO:0007026~negative regulation of microtubule depolymerization	4	1.23457	0.00148021	MTAP4, MTAP1B, CLASP1, APC	229	14	13588	16.9532	0.867999	0.0722546	2.40422
GOTERM_BP_FAT		GO:0044087~regulation of cellular component biogenesis	7	2.16049	0.00381425	S1PR1, GSN, SPNB2, MAPRE1, PROX1, KANK2, APC	229	89	13588	4.6669	0.994614	0.128444	6.08528
GOTERM_BP_FAT		GO:0032956~regulation of actin cytoskeleton organization	5	1.54321	0.0180996	S1PR1, GSN, SPNB2, PROX1, KANK2	229	60	13588	4.94469	1	0.30732	25.9239
GOTERM_BP_FAT		GO:0032970~regulation of actin filament-based process	5	1.54321	0.019122	S1PR1, GSN, SPNB2, PROX1, KANK2	229	61	13588	4.86363	1	0.314113	27.181
GOTERM_BP_FAT		GO:0032271~regulation of protein polymerization	4	1.23457	0.0705145	GSN, SPNB2, MAPRE1, APC	229	57	13588	4.16395	1	0.600311	69.9208
GOTERM_BP_FAT		GO:0032272~negative regulation of protein polymerization	3	0.925926	0.0748023	GSN, SPNB2, MAPRE1	229	27	13588	6.59292	1	0.612849	72.1211
GOTERM_BP_FAT		GO:0031333~negative regulation of protein complex assembly	3	0.925926	0.0748023	GSN, SPNB2, MAPRE1	229	27	13588	6.59292	1	0.612849	72.1211
GOTERM_BP_FAT		GO:0043254~regulation of protein complex assembly	4	1.23457	0.0957196	GSN, SPNB2, MAPRE1, APC	229	65	13588	3.65146	1	0.66724	80.8524
Annotation Cluster 5		Enrichment Score: 2.5019654700317795
Category		Term	Count	%	PValue	Genes	List Total	Pop Hits	Pop Total	Fold Enrichment	Bonferroni	Benjamini	FDR
GOTERM_BP_FAT	Cell migration	GO:0030334~regulation of cell migration	9	2.77778	0.000154097	COL18A1, S1PR1, ARHGAP5, PECAM1, TEK, NEXN, ARAP3, APC, THY1	229	92	13588	5.80463	0.189956	0.0130804	0.252861
GOTERM_BP_FAT		GO:0051270~regulation of cell motion	9	2.77778	0.000435319	COL18A1, S1PR1, ARHGAP5, PECAM1, TEK, NEXN, ARAP3, APC, THY1	229	107	13588	4.9909	0.448554	0.0308413	0.712777
GOTERM_BP_FAT		GO:0040012~regulation of locomotion	9	2.77778	0.000524206	COL18A1, S1PR1, ARHGAP5, PECAM1, TEK, NEXN, ARAP3, APC, THY1	229	110	13588	4.85478	0.511677	0.0352043	0.857731
GOTERM_BP_FAT		GO:0030335~positive regulation of cell migration	4	1.23457	0.0238245	COL18A1, S1PR1, ARHGAP5, APC	229	37	13588	6.41473	1	0.359456	32.7091
GOTERM_BP_FAT		GO:0051272~positive regulation of cell motion	4	1.23457	0.0311377	COL18A1, S1PR1, ARHGAP5, APC	229	41	13588	5.7889	1	0.421529	40.5293
GOTERM_BP_FAT		GO:0040017~positive regulation of locomotion	4	1.23457	0.0373072	COL18A1, S1PR1, ARHGAP5, APC	229	44	13588	5.3942	1	0.46538	46.4543
Annotation Cluster 6		Enrichment Score: 2.344319807680687
Category		Term	Count	%	PValue	Genes	List Total	Pop Hits	Pop Total	Fold Enrichment	Bonferroni	Benjamini	FDR
GOTERM_BP_FAT	Angiogenesis	GO:0001568~blood vessel development	12	3.7037	0.00278681	COL18A1, EMCN, FLT1, S1PR1, SPHK2, EPAS1, NAA15, ELK3, NR2F2, PROX1, CDH5, THY1	229	244	13588	2.91818	0.97796	0.112383	4.48126
GOTERM_BP_FAT		GO:0001944~vasculature development	12	3.7037	0.0033551	COL18A1, EMCN, FLT1, S1PR1, SPHK2, EPAS1, NAA15, ELK3, NR2F2, PROX1, CDH5, THY1	229	250	13588	2.84814	0.989889	0.119807	5.37161
GOTERM_BP_FAT		GO:0048514~blood vessel morphogenesis	10	3.08642	0.00628902	COL18A1, EMCN, FLT1, S1PR1, EPAS1, NAA15, ELK3, NR2F2, PROX1, THY1	229	198	13588	2.99678	0.99982	0.170957	9.84563
GOTERM_BP_FAT		GO:0001525~angiogenesis	8	2.46914	0.00713387	COL18A1, EMCN, FLT1, S1PR1, EPAS1, NAA15, ELK3, THY1	229	133	13588	3.5691	0.999944	0.181051	11.0967
Annotation Cluster 7		Enrichment Score: 2.3416587211820787
Category		Term	Count	%	PValue	Genes	List Total	Pop Hits	Pop Total	Fold Enrichment	Bonferroni	Benjamini	FDR
GOTERM_BP_FAT	Cell migration	GO:0016477~cell migration	13	4.01235	0.000745133	PLAT, NRP2, FLT1, FOXJ1, ZEB2, TNS1, NUP62, CNTN2, NR2F2, DCLK1, CHL1, MYH10, APC	229	240	13588	3.21405	0.639036	0.0415687	1.21715
GOTERM_BP_FAT		GO:0051674~localization of cell	13	4.01235	0.00309405	PLAT, NRP2, FLT1, FOXJ1, ZEB2, TNS1, NUP62, CNTN2, NR2F2, DCLK1, CHL1, MYH10, APC	229	284	13588	2.7161	0.985537	0.12047	4.9636
GOTERM_BP_FAT		GO:0048870~cell motility	13	4.01235	0.00309405	PLAT, NRP2, FLT1, FOXJ1, ZEB2, TNS1, NUP62, CNTN2, NR2F2, DCLK1, CHL1, MYH10, APC	229	284	13588	2.7161	0.985537	0.12047	4.9636
GOTERM_BP_FAT		GO:0006928~cell motion	14	4.32099	0.0091678	PLAT, NRP2, FLT1, FOXJ1, ZEB2, TNS1, NUP62, CNTN2, NGFR, NR2F2, DCLK1, CHL1, MYH10, APC	229	367	13588	2.26351	0.999997	0.207966	14.0419
GOTERM_BP_FAT		GO:0001764~neuron migration	5	1.54321	0.0299331	CNTN2, NR2F2, CHL1, DCLK1, MYH10	229	70	13588	4.2383	1	0.412929	39.3028
Annotation Cluster 8		Enrichment Score: 2.265298250766193
Category		Term	Count	%	PValue	Genes	List Total	Pop Hits	Pop Total	Fold Enrichment	Bonferroni	Benjamini	FDR
GOTERM_BP_FAT	Transcription and transcriptional regulation	GO:0006357~regulation of transcription from RNA polymerase II promoter	23	7.09877	0.000694569	SOX10, KLF12, EPAS1, FOXJ1, NFIX, ZFP148, ANKRD1, S1PR1, ZFP462, BPTF, MTF1, BCL11B, TRAK1, PER2, PBX1, NR2F2, NFIC, TCF4, NFATC2, BCOR, RUNX2, ZFHX3, DNAJB5	229	616	13588	2.21548	0.613184	0.0442213	1.13499
GOTERM_BP_FAT		GO:0010557~positive regulation of macromolecule biosynthetic process	20	6.17284	0.00153915	SOX10, EPAS1, KLF12, ZXDB, NFIX, ZFP148, TRIM24, SAMD4, PRKCQ, S1PR1, NUP62, MTF1, ZFP462, EBF3, GTF2F1, BCL11B, PBX1, NFIC, NFATC2, RUNX2	229	530	13588	2.2391	0.878232	0.0724433	2.49883
GOTERM_BP_FAT		GO:0031328~positive regulation of cellular biosynthetic process	20	6.17284	0.002439	SOX10, EPAS1, KLF12, ZXDB, NFIX, ZFP148, TRIM24, SAMD4, PRKCQ, S1PR1, NUP62, MTF1, ZFP462, EBF3, GTF2F1, BCL11B, PBX1, NFIC, NFATC2, RUNX2	229	552	13588	2.14986	0.964499	0.108732	3.93245
GOTERM_BP_FAT		GO:0009891~positive regulation of biosynthetic process	20	6.17284	0.00269777	SOX10, EPAS1, KLF12, ZXDB, NFIX, ZFP148, TRIM24, SAMD4, PRKCQ, S1PR1, NUP62, MTF1, ZFP462, EBF3, GTF2F1, BCL11B, PBX1, NFIC, NFATC2, RUNX2	229	557	13588	2.13057	0.975099	0.11582	4.34104
GOTERM_BP_FAT		GO:0045941~positive regulation of transcription	18	5.55556	0.00275149	SOX10, EPAS1, KLF12, ZXDB, NFIX, ZFP148, TRIM24, S1PR1, NUP62, MTF1, ZFP462, EBF3, GTF2F1, BCL11B, PBX1, NFIC, NFATC2, RUNX2	229	475	13588	2.24853	0.976866	0.114408	4.42566
GOTERM_BP_FAT		GO:0010628~positive regulation of gene expression	18	5.55556	0.00361198	SOX10, EPAS1, KLF12, ZXDB, NFIX, ZFP148, TRIM24, S1PR1, NUP62, MTF1, ZFP462, EBF3, GTF2F1, BCL11B, PBX1, NFIC, NFATC2, RUNX2	229	488	13588	2.18863	0.992892	0.125138	5.77152
GOTERM_BP_FAT		GO:0010604~positive regulation of macromolecule metabolic process	21	6.48148	0.00496695	SOX10, EPAS1, KLF12, ZXDB, NFIX, ZFP148, TRIM24, SAMD4, PRKCQ, S1PR1, NUP62, MTF1, ZFP462, EBF3, GTF2F1, BCL11B, PBX1, NFIC, NFATC2, RUNX2, APC	229	633	13588	1.9685	0.998894	0.146403	7.85474
GOTERM_BP_FAT		GO:0045935~positive regulation of nucleobase, nucleoside, nucleotide and nucleic acid metabolic process	18	5.55556	0.00561901	SOX10, EPAS1, KLF12, ZXDB, NFIX, ZFP148, TRIM24, S1PR1, NUP62, MTF1, ZFP462, EBF3, GTF2F1, BCL11B, PBX1, NFIC, NFATC2, RUNX2	229	510	13588	2.09422	0.999548	0.157325	8.84178
GOTERM_BP_FAT		GO:0051173~positive regulation of nitrogen compound metabolic process	18	5.55556	0.00771076	SOX10, EPAS1, KLF12, ZXDB, NFIX, ZFP148, TRIM24, S1PR1, NUP62, MTF1, ZFP462, EBF3, GTF2F1, BCL11B, PBX1, NFIC, NFATC2, RUNX2	229	526	13588	2.03052	0.999975	0.190735	11.9415
GOTERM_BP_FAT		GO:0045944~positive regulation of transcription from RNA polymerase II promoter	13	4.01235	0.0178809	SOX10, EPAS1, KLF12, NFIX, ZFP148, S1PR1, MTF1, ZFP462, BCL11B, PBX1, NFIC, NFATC2, RUNX2	229	358	13588	2.15467	1	0.311819	25.6524
GOTERM_BP_FAT		GO:0045893~positive regulation of transcription, DNA-dependent	13	4.01235	0.0483946	SOX10, EPAS1, KLF12, NFIX, ZFP148, S1PR1, MTF1, ZFP462, BCL11B, PBX1, NFIC, NFATC2, RUNX2	229	416	13588	1.85426	1	0.513919	55.7336
GOTERM_BP_FAT		GO:0051254~positive regulation of RNA metabolic process	13	4.01235	0.0503339	SOX10, EPAS1, KLF12, NFIX, ZFP148, S1PR1, MTF1, ZFP462, BCL11B, PBX1, NFIC, NFATC2, RUNX2	229	419	13588	1.84098	1	0.524383	57.1926
Annotation Cluster 9		Enrichment Score: 1.8629376681844283
Category		Term	Count	%	PValue	Genes	List Total	Pop Hits	Pop Total	Fold Enrichment	Bonferroni	Benjamini	FDR
GOTERM_BP_FAT	Transcription and transcriptional regulation	GO:0006357~regulation of transcription from RNA polymerase II promoter	23	7.09877	0.000694569	SOX10, KLF12, EPAS1, FOXJ1, NFIX, ZFP148, ANKRD1, S1PR1, ZFP462, BPTF, MTF1, BCL11B, TRAK1, PER2, PBX1, NR2F2, NFIC, TCF4, NFATC2, BCOR, RUNX2, ZFHX3, DNAJB5	229	616	13588	2.21548	0.613184	0.0442213	1.13499
GOTERM_BP_FAT		GO:0010629~negative regulation of gene expression	15	4.62963	0.00949578	KLF12, FOXJ1, ZEB2, TRIM24, BPTF, WWP1, PER2, FABP4, NFIC, TCF4, BCOR, NR2F2, TNRC6A, ZFHX3, DNAJB5	229	410	13588	2.17084	0.999998	0.21112	14.5081
GOTERM_BP_FAT		GO:0016481~negative regulation of transcription	14	4.32099	0.0102719	KLF12, FOXJ1, ZEB2, TRIM24, BPTF, WWP1, PER2, FABP4, NFIC, TCF4, BCOR, NR2F2, ZFHX3, DNAJB5	229	372	13588	2.23308	0.999999	0.222788	15.6021
GOTERM_BP_FAT		GO:0010558~negative regulation of macromolecule biosynthetic process	15	4.62963	0.0110554	KLF12, FOXJ1, ZEB2, TRIM24, BPTF, WWP1, PER2, FABP4, NFIC, TCF4, BCOR, NR2F2, TNRC6A, ZFHX3, DNAJB5	229	418	13588	2.12929	1	0.230501	16.693
GOTERM_BP_FAT		GO:0031327~negative regulation of cellular biosynthetic process	15	4.62963	0.0137883	KLF12, FOXJ1, ZEB2, TRIM24, BPTF, WWP1, PER2, FABP4, NFIC, TCF4, BCOR, NR2F2, TNRC6A, ZFHX3, DNAJB5	229	430	13588	2.06987	1	0.267392	20.3956
GOTERM_BP_FAT		GO:0009890~negative regulation of biosynthetic process	15	4.62963	0.0149078	KLF12, FOXJ1, ZEB2, TRIM24, BPTF, WWP1, PER2, FABP4, NFIC, TCF4, BCOR, NR2F2, TNRC6A, ZFHX3, DNAJB5	229	434	13588	2.05079	1	0.281915	21.8672
GOTERM_BP_FAT		GO:0000122~negative regulation of transcription from RNA polymerase II promoter	10	3.08642	0.0160879	KLF12, BPTF, FOXJ1, PER2, NR2F2, BCOR, TCF4, NFIC, ZFHX3, DNAJB5	229	231	13588	2.56867	1	0.296664	23.3908
GOTERM_BP_FAT		GO:0045934~negative regulation of nucleobase, nucleoside, nucleotide and nucleic acid metabolic process	14	4.32099	0.0164798	KLF12, FOXJ1, ZEB2, TRIM24, BPTF, WWP1, PER2, FABP4, NFIC, TCF4, BCOR, NR2F2, ZFHX3, DNAJB5	229	397	13588	2.09246	1	0.294939	23.8906
GOTERM_BP_FAT		GO:0051172~negative regulation of nitrogen compound metabolic process	14	4.32099	0.0179333	KLF12, FOXJ1, ZEB2, TRIM24, BPTF, WWP1, PER2, FABP4, NFIC, TCF4, BCOR, NR2F2, ZFHX3, DNAJB5	229	401	13588	2.07159	1	0.308722	25.7175
GOTERM_BP_FAT		GO:0045892~negative regulation of transcription, DNA-dependent	11	3.39506	0.0352795	KLF12, BPTF, FOXJ1, PER2, TRIM24, NR2F2, BCOR, TCF4, NFIC, ZFHX3, DNAJB5	229	308	13588	2.11915	1	0.454554	44.571
GOTERM_BP_FAT		GO:0051253~negative regulation of RNA metabolic process	11	3.39506	0.0368586	KLF12, BPTF, FOXJ1, PER2, TRIM24, NR2F2, BCOR, TCF4, NFIC, ZFHX3, DNAJB5	229	310	13588	2.10548	1	0.465311	46.043
GOTERM_BP_FAT		GO:0010605~negative regulation of macromolecule metabolic process	15	4.62963	0.0463635	KLF12, FOXJ1, ZEB2, TRIM24, BPTF, WWP1, PER2, FABP4, NFIC, TCF4, BCOR, NR2F2, TNRC6A, ZFHX3, DNAJB5	229	506	13588	1.75898	1	0.513762	54.1556
Annotation Cluster 10		Enrichment Score: 1.5878018187260543
Category		Term	Count	%	PValue	Genes	List Total	Pop Hits	Pop Total	Fold Enrichment	Bonferroni	Benjamini	FDR
GOTERM_BP_FAT	Cell junctions	GO:0034330~cell junction organization	4	1.23457	0.0161635	DLC1, TNS1, NF2, THY1	229	32	13588	7.41703	1	0.293945	23.4874
GOTERM_BP_FAT		GO:0007044~cell-substrate junction assembly	3	0.925926	0.0223379	DLC1, TNS1, THY1	229	14	13588	12.7149	1	0.344949	31.0055
GOTERM_BP_FAT		GO:0034329~cell junction assembly	3	0.925926	0.047755	DLC1, TNS1, THY1	229	21	13588	8.47661	1	0.512888	55.2422
Annotation Cluster 11		Enrichment Score: 1.499330029433722
Category		Term	Count	%	PValue	Genes	List Total	Pop Hits	Pop Total	Fold Enrichment	Bonferroni	Benjamini	FDR
GOTERM_BP_FAT	Neural morphogenesis and axon guidance	GO:0000902~cell morphogenesis	15	4.62963	0.000727183	COL18A1, NOX4, FOXJ1, PROX1, DAB2, BCL11B, MTAP7, NGFR, DST, DCLK1, CHL1, NFATC1, MYH10, ADD1, APC	229	309	13588	2.8804	0.630062	0.0441946	1.18799
GOTERM_BP_FAT		GO:0032989~cellular component morphogenesis	16	4.93827	0.000873395	COL18A1, NOX4, FOXJ1, PROX1, DAB2, BCL11B, MYH11, MTAP7, NGFR, DST, DCLK1, CHL1, APC, NFATC1, MYH10, ADD1	229	351	13588	2.70479	0.69713	0.0466547	1.42525
GOTERM_BP_FAT		GO:0000904~cell morphogenesis involved in differentiation	11	3.39506	0.00312039	COL18A1, DAB2, BCL11B, NGFR, PROX1, DST, CHL1, DCLK1, MYH10, APC, NFATC1	229	212	13588	3.07877	0.986049	0.11808	5.00483
GOTERM_BP_FAT		GO:0048666~neuron development	11	3.39506	0.0257337	GNAQ, BCL11B, MTAP1B, NTN4, NGFR, DST, CHL1, DCLK1, MYH10, APC, THY1	229	292	13588	2.23527	1	0.378226	34.8388
GOTERM_BP_FAT		GO:0048858~cell projection morphogenesis	8	2.46914	0.055035	FOXJ1, BCL11B, NGFR, DST, CHL1, DCLK1, MYH10, APC	229	202	13588	2.34995	1	0.54598	60.5441
GOTERM_BP_FAT		GO:0007409~axonogenesis	7	2.16049	0.0571279	BCL11B, NGFR, DST, CHL1, DCLK1, MYH10, APC	229	163	13588	2.54818	1	0.548947	61.9555
GOTERM_BP_FAT		GO:0032990~cell part morphogenesis	8	2.46914	0.0669297	FOXJ1, BCL11B, NGFR, DST, CHL1, DCLK1, MYH10, APC	229	212	13588	2.2391	1	0.590731	67.9572
GOTERM_BP_FAT		GO:0030182~neuron differentiation	12	3.7037	0.0733016	S1PR1, GNAQ, BCL11B, MTAP1B, NTN4, NGFR, DST, CHL1, DCLK1, MYH10, APC, THY1	229	399	13588	1.78455	1	0.608406	71.3687
GOTERM_BP_FAT		GO:0031175~neuron projection development	8	2.46914	0.075311	BCL11B, MTAP1B, NGFR, DST, CHL1, DCLK1, MYH10, APC	229	218	13588	2.17748	1	0.612173	72.3718
GOTERM_BP_FAT		GO:0048812~neuron projection morphogenesis	7	2.16049	0.0766281	BCL11B, NGFR, DST, CHL1, DCLK1, MYH10, APC	229	176	13588	2.35996	1	0.615564	73.0113
GOTERM_BP_FAT		GO:0048667~cell morphogenesis involved in neuron differentiation	7	2.16049	0.0856686	BCL11B, NGFR, DST, CHL1, DCLK1, MYH10, APC	229	182	13588	2.28216	1	0.64568	77.0395
GOTERM_BP_FAT		GO:0030030~cell projection organization	9	2.77778	0.1687	FOXJ1, BCL11B, MTAP1B, NGFR, DST, CHL1, DCLK1, MYH10, APC	229	319	13588	1.67406	1	0.818513	95.1947
GOTERM_BP_FAT		GO:0007411~axon guidance	3	0.925926	0.491749	NGFR, CHL1, MYH10	229	98	13588	1.81642	1	0.986473	99.9985
Annotation Cluster 12		Enrichment Score: 1.4360805225011017
Category		Term	Count	%	PValue	Genes	List Total	Pop Hits	Pop Total	Fold Enrichment	Bonferroni	Benjamini	FDR
GOTERM_BP_FAT	Regulation of cell division / cell cycle	GO:0031110~regulation of microtubule polymerization or depolymerization	6	1.85185	9.12904e-05	MTAP4, MTAP1B, CLASP1, MAPRE1, DST, APC	229	28	13588	12.7149	0.117326	0.0124024	0.149873
GOTERM_BP_FAT		GO:0031111~negative regulation of microtubule polymerization or depolymerization	5	1.54321	0.000119916	MTAP4, MTAP1B, CLASP1, MAPRE1, APC	229	16	13588	18.5426	0.151203	0.0125312	0.196825
GOTERM_BP_FAT		GO:0070507~regulation of microtubule cytoskeleton organization	6	1.85185	0.000313961	MTAP4, MTAP1B, CLASP1, MAPRE1, DST, APC	229	36	13588	9.88937	0.349005	0.0235653	0.514551
GOTERM_BP_FAT		GO:0032886~regulation of microtubule-based process	6	1.85185	0.00090024	MTAP4, MTAP1B, CLASP1, MAPRE1, DST, APC	229	45	13588	7.9115	0.708053	0.0462495	1.46875
GOTERM_BP_FAT		GO:0000278~mitotic cell cycle	8	2.46914	0.117032	CCND2, INCENP, CLASP1, MAPRE1, SMC2, DNAJC2, APC, NFATC1	229	244	13588	1.94545	1	0.727147	87.0598
GOTERM_BP_FAT		GO:0022402~cell cycle process	11	3.39506	0.125654	CCND2, INCENP, PSMC3IP, CLASP1, MAPRE1, SMC2, DNAJC2, DST, MYH10, APC, NFATC1	229	393	13588	1.66081	1	0.738116	88.9864
GOTERM_BP_FAT		GO:0022403~cell cycle phase	9	2.77778	0.186943	CCND2, INCENP, PSMC3IP, CLASP1, MAPRE1, SMC2, DNAJC2, APC, NFATC1	229	328	13588	1.62813	1	0.840713	96.6626
GOTERM_BP_FAT		GO:0051301~cell division	8	2.46914	0.194032	CCND2, INCENP, CLASP1, PDCD6IP, MAPRE1, SMC2, MYH10, APC	229	281	13588	1.68929	1	0.848964	97.1099
GOTERM_BP_FAT		GO:0007049~cell cycle	13	4.01235	0.328362	CDC5L, SMC2, CCND2, INCENP, PSMC3IP, CLASP1, PDCD6IP, MAPRE1, DST, DNAJC2, NFATC1, MYH10, APC	229	611	13588	1.26247	1	0.942947	99.8554
GOTERM_BP_FAT		GO:0007067~mitosis	5	1.54321	0.398024	INCENP, CLASP1, MAPRE1, SMC2, APC	229	190	13588	1.56148	1	0.967214	99.9761
GOTERM_BP_FAT		GO:0000280~nuclear division	5	1.54321	0.398024	INCENP, CLASP1, MAPRE1, SMC2, APC	229	190	13588	1.56148	1	0.967214	99.9761
GOTERM_BP_FAT		GO:0000087~M phase of mitotic cell cycle	5	1.54321	0.413341	INCENP, CLASP1, MAPRE1, SMC2, APC	229	194	13588	1.52928	1	0.971455	99.9843
GOTERM_BP_FAT		GO:0048285~organelle fission	5	1.54321	0.424764	INCENP, CLASP1, MAPRE1, SMC2, APC	229	197	13588	1.506	1	0.974055	99.9887
GOTERM_BP_FAT		GO:0000279~M phase	6	1.85185	0.520766	INCENP, PSMC3IP, CLASP1, MAPRE1, SMC2, APC	229	283	13588	1.25801	1	0.989212	99.9994
Annotation Cluster 13		Enrichment Score: 1.3486890783947307
Category		Term	Count	%	PValue	Genes	List Total	Pop Hits	Pop Total	Fold Enrichment	Bonferroni	Benjamini	FDR
GOTERM_BP_FAT	Kinase / phosphatase activity and intracellular signalling cascades	GO:0010648~negative regulation of cell communication	10	3.08642	0.00419923	IGF1R, NF2, NUP62, GRIK3, NGFR, ARAP3, RGS16, RUNX2, APC, THY1	229	186	13588	3.19012	0.996825	0.133949	6.67978
GOTERM_BP_FAT		GO:0044092~negative regulation of molecular function	8	2.46914	0.00685344	S1PR1, ZFP462, NF2, NUP62, FOXJ1, FABP4, APC, THY1	229	132	13588	3.59614	0.999917	0.181285	10.6832
GOTERM_BP_FAT		GO:0009968~negative regulation of signal transduction	9	2.77778	0.00825434	IGF1R, NF2, NUP62, NGFR, ARAP3, RGS16, RUNX2, APC, THY1	229	171	13588	3.12296	0.999988	0.19579	12.7307
GOTERM_BP_FAT		GO:0033673~negative regulation of kinase activity	5	1.54321	0.0104185	NF2, NUP62, FABP4, APC, THY1	229	51	13588	5.81728	0.999999	0.222111	15.8071
GOTERM_BP_FAT		GO:0006469~negative regulation of protein kinase activity	5	1.54321	0.0104185	NF2, NUP62, FABP4, APC, THY1	229	51	13588	5.81728	0.999999	0.222111	15.8071
GOTERM_BP_FAT		GO:0051348~negative regulation of transferase activity	5	1.54321	0.0118962	NF2, NUP62, FABP4, APC, THY1	229	53	13588	5.59776	1	0.238648	17.849
GOTERM_BP_FAT		GO:0043409~negative regulation of MAPKKK cascade	3	0.925926	0.0193582	IGF1R, NF2, APC	229	13	13588	13.693	1	0.31365	27.4685
GOTERM_BP_FAT		GO:0043086~negative regulation of catalytic activity	6	1.85185	0.0275259	S1PR1, NF2, NUP62, FABP4, APC, THY1	229	101	13588	3.52493	1	0.394708	36.7804
GOTERM_BP_FAT		GO:0010741~negative regulation of protein kinase cascade	3	0.925926	0.0653279	IGF1R, NF2, APC	229	25	13588	7.12035	1	0.585035	67.0414
GOTERM_BP_FAT		GO:0045859~regulation of protein kinase activity	7	2.16049	0.0938511	NF2, SPHK2, NUP62, FABP4, ZEB2, APC, THY1	229	186	13588	2.23308	1	0.662589	80.1919
GOTERM_BP_FAT		GO:0043549~regulation of kinase activity	7	2.16049	0.105181	NF2, SPHK2, NUP62, FABP4, ZEB2, APC, THY1	229	192	13588	2.1633	1	0.697666	83.891
GOTERM_BP_FAT		GO:0042325~regulation of phosphorylation	9	2.77778	0.115541	ARRB2, NF2, SPHK2, NUP62, FABP4, ZEB2, PPP1R14A, APC, THY1	229	290	13588	1.84147	1	0.725022	86.6959
GOTERM_BP_FAT		GO:0051338~regulation of transferase activity	7	2.16049	0.119483	NF2, SPHK2, NUP62, FABP4, ZEB2, APC, THY1	229	199	13588	2.0872	1	0.729602	87.6374
GOTERM_BP_FAT		GO:0010627~regulation of protein kinase cascade	6	1.85185	0.11986	IGF1R, NF2, NUP62, ZEB2, ITSN1, APC	229	155	13588	2.29689	1	0.728141	87.7241
GOTERM_BP_FAT		GO:0051174~regulation of phosphorus metabolic process	9	2.77778	0.134091	ARRB2, NF2, SPHK2, NUP62, FABP4, ZEB2, PPP1R14A, APC, THY1	229	301	13588	1.77417	1	0.754832	90.6081
GOTERM_BP_FAT		GO:0019220~regulation of phosphate metabolic process	9	2.77778	0.134091	ARRB2, NF2, SPHK2, NUP62, FABP4, ZEB2, PPP1R14A, APC, THY1	229	301	13588	1.77417	1	0.754832	90.6081
GOTERM_BP_FAT		GO:0043408~regulation of MAPKKK cascade	4	1.23457	0.205117	IGF1R, NF2, ZEB2, APC	229	93	13588	2.5521	1	0.857602	97.698
GOTERM_BP_FAT		GO:0048584~positive regulation of response to stimulus	3	0.925926	0.822666	S1PR1, FABP4, THY1	229	186	13588	0.957036	1	0.999751	100
Annotation Cluster 14		Enrichment Score: 1.1491238234127767
Category		Term	Count	%	PValue	Genes	List Total	Pop Hits	Pop Total	Fold Enrichment	Bonferroni	Benjamini	FDR
GOTERM_BP_FAT	Protein complex assembly	GO:0006461~protein complex assembly	11	3.39506	0.00506335	STOM, IGF1R, TUBB2B, SCUBE3, GSN, GTF2F1, MYH11, TRIM24, DIAP2, OLFM1, APC	229	227	13588	2.87532	0.999031	0.145901	8.00129
GOTERM_BP_FAT		GO:0070271~protein complex biogenesis	11	3.39506	0.00506335	STOM, IGF1R, TUBB2B, SCUBE3, GSN, GTF2F1, MYH11, TRIM24, DIAP2, OLFM1, APC	229	227	13588	2.87532	0.999031	0.145901	8.00129
GOTERM_BP_FAT		GO:0065003~macromolecular complex assembly	12	3.7037	0.0276708	STOM, IGF1R, TUBB2B, SCUBE3, GSN, GTF2F1, MYH11, SLU7, TRIM24, DIAP2, OLFM1, APC	229	338	13588	2.10661	1	0.392359	36.935
GOTERM_BP_FAT		GO:0043933~macromolecular complex subunit organization	12	3.7037	0.0458286	STOM, IGF1R, TUBB2B, SCUBE3, GSN, GTF2F1, MYH11, SLU7, TRIM24, DIAP2, OLFM1, APC	229	367	13588	1.94015	1	0.513514	53.7313
GOTERM_BP_FAT		GO:0051259~protein oligomerization	4	1.23457	0.120337	STOM, IGF1R, SCUBE3, OLFM1	229	72	13588	3.29646	1	0.727007	87.8329
GOTERM_BP_FAT		GO:0051258~protein polymerization	3	0.925926	0.144705	TUBB2B, GSN, DIAP2	229	40	13588	4.45022	1	0.775578	92.3308
GOTERM_BP_FAT		GO:0043623~cellular protein complex assembly	4	1.23457	0.271987	TUBB2B, GSN, MYH11, DIAP2	229	108	13588	2.19764	1	0.915037	99.4566
GOTERM_BP_FAT		GO:0034622~cellular macromolecular complex assembly	5	1.54321	0.499337	TUBB2B, GSN, MYH11, SLU7, DIAP2	229	217	13588	1.36719	1	0.987198	99.9988
GOTERM_BP_FAT		GO:0034621~cellular macromolecular complex subunit organization	5	1.54321	0.591598	TUBB2B, GSN, MYH11, SLU7, DIAP2	229	245	13588	1.21094	1	0.994412	100
Annotation Cluster 15		Enrichment Score: 1.013302374991046
Category		Term	Count	%	PValue	Genes	List Total	Pop Hits	Pop Total	Fold Enrichment	Bonferroni	Benjamini	FDR
GOTERM_BP_FAT	Muscle structure, development and differentiation	GO:0031032~actomyosin structure organization	4	1.23457	0.00816592	LIMCH1, MYH11, PROX1, MYH10	229	25	13588	9.4938	0.999986	0.197302	12.6028
GOTERM_BP_FAT		GO:0030239~myofibril assembly	3	0.925926	0.0397418	MYH11, PROX1, MYH10	229	19	13588	9.36888	1	0.483124	48.6361
GOTERM_BP_FAT		GO:0055002~striated muscle cell development	4	1.23457	0.0619571	TNC, MYH11, PROX1, MYH10	229	54	13588	4.39528	1	0.575644	65.0333
GOTERM_BP_FAT		GO:0055001~muscle cell development	4	1.23457	0.0826994	TNC, MYH11, PROX1, MYH10	229	61	13588	3.8909	1	0.638408	75.7833
GOTERM_BP_FAT		GO:0010927~cellular component assembly involved in morphogenesis	3	0.925926	0.121936	MYH11, PROX1, MYH10	229	36	13588	4.94469	1	0.729383	88.1912
GOTERM_BP_FAT		GO:0042692~muscle cell differentiation	5	1.54321	0.133926	LGALS1, TNC, MYH11, PROX1, MYH10	229	117	13588	2.53574	1	0.756845	90.5787
GOTERM_BP_FAT		GO:0014706~striated muscle tissue development	5	1.54321	0.165034	TNC, MYH11, NR2F2, PROX1, MYH10	229	127	13588	2.33607	1	0.813116	94.8345
GOTERM_BP_FAT		GO:0007517~muscle organ development	6	1.85185	0.175228	TNC, MYH11, NR2F2, PROX1, ZFHX3, MYH10	229	176	13588	2.02283	1	0.82317	95.7784
GOTERM_BP_FAT		GO:0051146~striated muscle cell differentiation	4	1.23457	0.187972	TNC, MYH11, PROX1, MYH10	229	89	13588	2.6668	1	0.840605	96.7314
GOTERM_BP_FAT		GO:0060537~muscle tissue development	5	1.54321	0.195013	TNC, MYH11, NR2F2, PROX1, MYH10	229	136	13588	2.18148	1	0.848748	97.1671
GOTERM_BP_FAT		GO:0048738~cardiac muscle tissue development	3	0.925926	0.248026	MYH11, PROX1, MYH10	229	57	13588	3.12296	1	0.894855	99.0749
Annotation Cluster 16		Enrichment Score: 0.9387027413062868
Category		Term	Count	%	PValue	Genes	List Total	Pop Hits	Pop Total	Fold Enrichment	Bonferroni	Benjamini	FDR
GOTERM_BP_FAT	Transcription and transcriptional regulation	GO:0010553~negative regulation of specific transcription from RNA polymerase II promoter	3	0.925926	0.047755	FOXJ1, PER2, BCOR	229	21	13588	8.47661	1	0.512888	55.2422
GOTERM_BP_FAT		GO:0032582~negative regulation of gene-specific transcription	3	0.925926	0.0562983	FOXJ1, PER2, BCOR	229	23	13588	7.73951	1	0.550721	61.4018
GOTERM_BP_FAT		GO:0010551~regulation of specific transcription from RNA polymerase II promoter	3	0.925926	0.210807	FOXJ1, PER2, BCOR	229	51	13588	3.49037	1	0.862682	97.9543
GOTERM_BP_FAT		GO:0032583~regulation of gene-specific transcription	3	0.925926	0.310306	FOXJ1, PER2, BCOR	229	67	13588	2.65685	1	0.932884	99.7765
Annotation Cluster 17		Enrichment Score: 0.9201010607139137
Category		Term	Count	%	PValue	Genes	List Total	Pop Hits	Pop Total	Fold Enrichment	Bonferroni	Benjamini	FDR
GOTERM_BP_FAT	Ras/Rho signal transduction and GTPas activity	GO:0043547~positive regulation of GTPase activity	3	0.925926	0.0193582	S1PR1, FOXJ1, THY1	229	13	13588	13.693	1	0.31365	27.4685
GOTERM_BP_FAT		GO:0051345~positive regulation of hydrolase activity	5	1.54321	0.0472081	S1PR1, GNAQ, FOXJ1, IFT57, THY1	229	81	13588	3.66273	1	0.516374	54.8181
GOTERM_BP_FAT		GO:0043087~regulation of GTPase activity	4	1.23457	0.205117	S1PR1, FOXJ1, ARAP3, THY1	229	93	13588	2.5521	1	0.857602	97.698
GOTERM_BP_FAT		GO:0051336~regulation of hydrolase activity	6	1.85185	0.234396	S1PR1, GNAQ, FOXJ1, IFT57, ARAP3, THY1	229	196	13588	1.81642	1	0.884724	98.7574
GOTERM_BP_FAT		GO:0044093~positive regulation of molecular function	8	2.46914	0.250196	PRKCQ, S1PR1, SPHK2, GNAQ, FOXJ1, IFT57, ZEB2, THY1	229	306	13588	1.55127	1	0.895876	99.1178
GOTERM_BP_FAT		GO:0043085~positive regulation of catalytic activity	7	2.16049	0.274334	S1PR1, SPHK2, GNAQ, FOXJ1, IFT57, ZEB2, THY1	229	261	13588	1.59139	1	0.915968	99.4847
Annotation Cluster 18		Enrichment Score: 0.9144399219807978
Category		Term	Count	%	PValue	Genes	List Total	Pop Hits	Pop Total	Fold Enrichment	Bonferroni	Benjamini	FDR
GOTERM_BP_FAT	Kinase / phosphatase activity and intracellular signalling cascades	GO:0007167~enzyme linked receptor protein signaling pathway	10	3.08642	0.0415412	PLAT, IGF1R, FLT1, SPNB2, TEK, PTPRA, GFRA1, AKAP2, GFRA2, PDAP1	229	273	13588	2.17349	1	0.494574	50.1947
GOTERM_BP_FAT		GO:0007169~transmembrane receptor protein tyrosine kinase signaling pathway	8	2.46914	0.0434746	PLAT, IGF1R, FLT1, TEK, PTPRA, GFRA1, GFRA2, PDAP1	229	192	13588	2.47234	1	0.502617	51.8199
GOTERM_BP_FAT		GO:0007166~cell surface receptor linked signal transduction	23	7.09877	0.999921	PLAT, PLP1, FLT1, SPHK2, PTPRA, OXTR, RGS16, LGR5, PDAP1, THY1, IGF1R, S1PR1, SFRP1, NUP62, GNAQ, SPNB2, TEK, GFRA1, HTR1D, AKAP2, GFRA2, GPR116, APC	229	2495	13588	0.546987	1	1	100
Annotation Cluster 19		Enrichment Score: 0.891989104405307
Category		Term	Count	%	PValue	Genes	List Total	Pop Hits	Pop Total	Fold Enrichment	Bonferroni	Benjamini	FDR
GOTERM_BP_FAT	Ras/Rho signal transduction and GTPas activity	GO:0035023~regulation of Rho protein signal transduction	5	1.54321	0.0565534	BCR, FOXJ1, ARHGEF17, ITSN1, ARAP3	229	86	13588	3.44978	1	0.548783	61.5729
GOTERM_BP_FAT		GO:0046578~regulation of Ras protein signal transduction	7	2.16049	0.0850196	BCR, S1PR1, NUP62, FOXJ1, ARHGEF17, ITSN1, ARAP3	229	181	13588	2.29477	1	0.645885	76.7702
GOTERM_BP_FAT		GO:0051056~regulation of small GTPase mediated signal transduction	8	2.46914	0.0902835	BCR, S1PR1, NUP62, FOXJ1, ARHGEF17, ITSN1, ARAP3, IQGAP1	229	228	13588	2.08197	1	0.650627	78.871
GOTERM_BP_FAT		GO:0043087~regulation of GTPase activity	4	1.23457	0.205117	S1PR1, FOXJ1, ARAP3, THY1	229	93	13588	2.5521	1	0.857602	97.698
GOTERM_BP_FAT		GO:0032318~regulation of Ras GTPase activity	3	0.925926	0.389462	S1PR1, FOXJ1, ARAP3	229	80	13588	2.22511	1	0.965696	99.9698
Annotation Cluster 20		Enrichment Score: 0.865490784607301
Category		Term	Count	%	PValue	Genes	List Total	Pop Hits	Pop Total	Fold Enrichment	Bonferroni	Benjamini	FDR
GOTERM_BP_FAT	Tissue morphogenesis	GO:0048729~tissue morphogenesis	9	2.77778	0.0476564	DLC1, IGF1R, SFRP1, NF2, TNC, PBX1, ZEB2, NGFR, PROX1	229	238	13588	2.24381	1	0.515937	55.1661
GOTERM_BP_FAT		GO:0060740~prostate gland epithelium morphogenesis	3	0.925926	0.070012	IGF1R, SFRP1, TNC	229	26	13588	6.84649	1	0.600971	69.6525
GOTERM_BP_FAT		GO:0002009~morphogenesis of an epithelium	7	2.16049	0.0718288	DLC1, IGF1R, SFRP1, TNC, PBX1, ZEB2, PROX1	229	173	13588	2.40089	1	0.603991	70.612
GOTERM_BP_FAT		GO:0060512~prostate gland morphogenesis	3	0.925926	0.0748023	IGF1R, SFRP1, TNC	229	27	13588	6.59292	1	0.612849	72.1211
GOTERM_BP_FAT		GO:0060429~epithelium development	9	2.77778	0.0861687	COL18A1, DLC1, IGF1R, S1PR1, SFRP1, TNC, PBX1, ZEB2, PROX1	229	271	13588	1.97058	1	0.644817	77.2449
GOTERM_BP_FAT		GO:0001655~urogenital system development	6	1.85185	0.0994195	IGF1R, OSR1, SFRP1, TNC, PBX1, APC	229	146	13588	2.43848	1	0.678926	82.0996
GOTERM_BP_FAT		GO:0030850~prostate gland development	3	0.925926	0.13893	IGF1R, SFRP1, TNC	229	39	13588	4.56433	1	0.765473	91.4343
GOTERM_BP_FAT		GO:0048608~reproductive structure development	5	1.54321	0.174837	IGF1R, OSR1, SFRP1, TNC, MTAP7	229	130	13588	2.28216	1	0.824435	95.7454
GOTERM_BP_FAT		GO:0022612~gland morphogenesis	3	0.925926	0.413049	IGF1R, SFRP1, TNC	229	84	13588	2.11915	1	0.971855	99.9842
GOTERM_BP_FAT		GO:0048732~gland development	5	1.54321	0.424764	IGF1R, ARHGAP5, SFRP1, TNC, PBX1	229	197	13588	1.506	1	0.974055	99.9887
GOTERM_BP_FAT		GO:0003006~reproductive developmental process	6	1.85185	0.460991	IGF1R, OSR1, SFRP1, TNC, PBX1, MTAP7	229	264	13588	1.34855	1	0.981757	99.9961
Annotation Cluster 21		Enrichment Score: 0.8295271294493736
Category		Term	Count	%	PValue	Genes	List Total	Pop Hits	Pop Total	Fold Enrichment	Bonferroni	Benjamini	FDR
GOTERM_BP_FAT	Eye development	GO:0060041~retina development in camera-type eye	4	1.23457	0.0161635	PROX1, MYH10, APC, THY1	229	32	13588	7.41703	1	0.293945	23.4874
GOTERM_BP_FAT		GO:0043010~camera-type eye development	5	1.54321	0.174837	BCL11B, PROX1, MYH10, APC, THY1	229	130	13588	2.28216	1	0.824435	95.7454
GOTERM_BP_FAT		GO:0001654~eye development	5	1.54321	0.27032	BCL11B, PROX1, MYH10, APC, THY1	229	157	13588	1.88969	1	0.914716	99.4358
GOTERM_BP_FAT		GO:0007423~sensory organ development	5	1.54321	0.629284	BCL11B, PROX1, MYH10, APC, THY1	229	257	13588	1.1544	1	0.995971	100
Annotation Cluster 22		Enrichment Score: 0.8192618466636662
Category		Term	Count	%	PValue	Genes	List Total	Pop Hits	Pop Total	Fold Enrichment	Bonferroni	Benjamini	FDR
GOTERM_BP_FAT	Homeostasis and ion transport	GO:0060249~anatomical structure homeostasis	5	1.54321	0.0508348	NOX4, EPAS1, PARP4, APC, ADD1	229	83	13588	3.57447	1	0.524274	57.562
GOTERM_BP_FAT		GO:0001894~tissue homeostasis	3	0.925926	0.204655	NOX4, EPAS1, ADD1	229	50	13588	3.56017	1	0.858625	97.6759
GOTERM_BP_FAT		GO:0048871~multicellular organismal homeostasis	3	0.925926	0.33499	NOX4, EPAS1, ADD1	229	71	13588	2.50717	1	0.945226	99.8772
Annotation Cluster 23		Enrichment Score: 0.7960575596618419
Category		Term	Count	%	PValue	Genes	List Total	Pop Hits	Pop Total	Fold Enrichment	Bonferroni	Benjamini	FDR
GOTERM_BP_FAT	Regulation of neuron function	GO:0001508~regulation of action potential	4	1.23457	0.0619571	PLP1, GNAQ, HEXA, MBP	229	54	13588	4.39528	1	0.575644	65.0333
GOTERM_BP_FAT		GO:0042592~homeostatic process	16	4.93827	0.0651119	NOX4, PLP1, JPH2, LDLR, EPAS1, HEXA, GRIK3, TRIM24, MBP, S1PR1, GNAQ, FABP4, MTAP7, PARP4, APC, ADD1	229	584	13588	1.62565	1	0.587278	66.916
GOTERM_BP_FAT		GO:0048878~chemical homeostasis	11	3.39506	0.0885626	PLP1, S1PR1, JPH2, LDLR, EPAS1, GNAQ, HEXA, GRIK3, FABP4, TRIM24, MBP	229	365	13588	1.78822	1	0.652287	78.2047
GOTERM_BP_FAT		GO:0042552~myelination	3	0.925926	0.127542	PLP1, HEXA, MBP	229	37	13588	4.81105	1	0.741163	89.3707
GOTERM_BP_FAT		GO:0008366~axon ensheathment	3	0.925926	0.13893	PLP1, HEXA, MBP	229	39	13588	4.56433	1	0.765473	91.4343
GOTERM_BP_FAT		GO:0007272~ensheathment of neurons	3	0.925926	0.13893	PLP1, HEXA, MBP	229	39	13588	4.56433	1	0.765473	91.4343
GOTERM_BP_FAT		GO:0042391~regulation of membrane potential	5	1.54321	0.139942	PLP1, GNAQ, HEXA, GRIK3, MBP	229	119	13588	2.49312	1	0.765731	91.5981
GOTERM_BP_FAT		GO:0019228~regulation of action potential in neuron	3	0.925926	0.174254	PLP1, HEXA, MBP	229	45	13588	3.95575	1	0.825339	95.6958
GOTERM_BP_FAT		GO:0019725~cellular homeostasis	9	2.77778	0.21828	PLP1, S1PR1, JPH2, GNAQ, HEXA, GRIK3, APC, MBP, ADD1	229	343	13588	1.55693	1	0.87	98.2503
GOTERM_BP_FAT		GO:0050801~ion homeostasis	8	2.46914	0.222652	PLP1, S1PR1, JPH2, GNAQ, HEXA, GRIK3, TRIM24, MBP	229	293	13588	1.6201	1	0.874331	98.4043
GOTERM_BP_FAT		GO:0006873~cellular ion homeostasis	7	2.16049	0.274334	PLP1, S1PR1, JPH2, GNAQ, HEXA, GRIK3, MBP	229	261	13588	1.59139	1	0.915968	99.4847
GOTERM_BP_FAT		GO:0055082~cellular chemical homeostasis	7	2.16049	0.29495	PLP1, S1PR1, JPH2, GNAQ, HEXA, GRIK3, MBP	229	268	13588	1.54983	1	0.92441	99.679
GOTERM_BP_FAT		GO:0019226~transmission of nerve impulse	5	1.54321	0.531131	PLP1, S1PR1, TRIM9, HEXA, MBP	229	226	13588	1.31275	1	0.990372	99.9996
Annotation Cluster 24		Enrichment Score: 0.7699997410532461
Category		Term	Count	%	PValue	Genes	List Total	Pop Hits	Pop Total	Fold Enrichment	Bonferroni	Benjamini	FDR
GOTERM_BP_FAT	Regulation of cell division / cell cycle	GO:0000278~mitotic cell cycle	8	2.46914	0.117032	CCND2, INCENP, CLASP1, MAPRE1, SMC2, DNAJC2, APC, NFATC1	229	244	13588	1.94545	1	0.727147	87.0598
GOTERM_BP_FAT		GO:0051329~interphase of mitotic cell cycle	3	0.925926	0.198523	CCND2, DNAJC2, NFATC1	229	49	13588	3.63283	1	0.852607	97.3633
GOTERM_BP_FAT		GO:0051325~interphase	3	0.925926	0.210807	CCND2, DNAJC2, NFATC1	229	51	13588	3.49037	1	0.862682	97.9543
Annotation Cluster 25		Enrichment Score: 0.706960556276082
Category		Term	Count	%	PValue	Genes	List Total	Pop Hits	Pop Total	Fold Enrichment	Bonferroni	Benjamini	FDR
GOTERM_BP_FAT	Mesenchymal cell development	GO:0014031~mesenchymal cell development	3	0.925926	0.186332	NRP2, ZEB2, NFATC1	229	47	13588	3.78742	1	0.841554	96.6212
GOTERM_BP_FAT		GO:0048762~mesenchymal cell differentiation	3	0.925926	0.198523	NRP2, ZEB2, NFATC1	229	49	13588	3.63283	1	0.852607	97.3633
GOTERM_BP_FAT		GO:0060485~mesenchyme development	3	0.925926	0.204655	NRP2, ZEB2, NFATC1	229	50	13588	3.56017	1	0.858625	97.6759
Annotation Cluster 26		Enrichment Score: 0.7019698219611414
Category		Term	Count	%	PValue	Genes	List Total	Pop Hits	Pop Total	Fold Enrichment	Bonferroni	Benjamini	FDR
GOTERM_BP_FAT	Developmental pattern formation	GO:0009952~anterior/posterior pattern formation	6	1.85185	0.115157	SFRP1, PBX1, ZEB2, NR2F2, APC, MLLT3	229	153	13588	2.32691	1	0.726506	86.6007
GOTERM_BP_FAT		GO:0007389~pattern specification process	8	2.46914	0.200956	FLT1, SFRP1, FOXJ1, PBX1, ZEB2, NR2F2, APC, MLLT3	229	284	13588	1.67144	1	0.854672	97.4918
GOTERM_BP_FAT		GO:0035282~segmentation	3	0.925926	0.229364	SFRP1, ZEB2, MLLT3	229	54	13588	3.29646	1	0.879967	98.6162
GOTERM_BP_FAT		GO:0003002~regionalization	6	1.85185	0.293227	SFRP1, PBX1, ZEB2, NR2F2, APC, MLLT3	229	214	13588	1.66363	1	0.924099	99.6659
Annotation Cluster 27		Enrichment Score: 0.645681177940559
Category		Term	Count	%	PValue	Genes	List Total	Pop Hits	Pop Total	Fold Enrichment	Bonferroni	Benjamini	FDR
GOTERM_BP_FAT	Tissue morphogenesis	GO:0048729~tissue morphogenesis	9	2.77778	0.0476564	DLC1, IGF1R, SFRP1, NF2, TNC, PBX1, ZEB2, NGFR, PROX1	229	238	13588	2.24381	1	0.515937	55.1661
GOTERM_BP_FAT		GO:0002009~morphogenesis of an epithelium	7	2.16049	0.0718288	DLC1, IGF1R, SFRP1, TNC, PBX1, ZEB2, PROX1	229	173	13588	2.40089	1	0.603991	70.612
GOTERM_BP_FAT		GO:0060429~epithelium development	9	2.77778	0.0861687	COL18A1, DLC1, IGF1R, S1PR1, SFRP1, TNC, PBX1, ZEB2, PROX1	229	271	13588	1.97058	1	0.644817	77.2449
GOTERM_BP_FAT		GO:0035295~tube development	6	1.85185	0.460991	DLC1, FLT1, EPAS1, WWP1, PBX1, ZEB2	229	264	13588	1.34855	1	0.981757	99.9961
GOTERM_BP_FAT		GO:0035239~tube morphogenesis	4	1.23457	0.549435	DLC1, FLT1, PBX1, ZEB2	229	171	13588	1.38798	1	0.991604	99.9998
GOTERM_BP_FAT		GO:0060562~epithelial tube morphogenesis	3	0.925926	0.55863	DLC1, PBX1, ZEB2	229	111	13588	1.60368	1	0.99242	99.9999
GOTERM_BP_FAT		GO:0048598~embryonic morphogenesis	6	1.85185	0.723984	DLC1, NF2, GNAQ, PBX1, ZEB2, PROX1	229	359	13588	0.991692	1	0.998661	100
Annotation Cluster 28		Enrichment Score: 0.6333426901628174
Category		Term	Count	%	PValue	Genes	List Total	Pop Hits	Pop Total	Fold Enrichment	Bonferroni	Benjamini	FDR
GOTERM_BP_FAT	Membrane and vesicle function	GO:0016044~membrane organization	8	2.46914	0.173729	CORO1C, DAB2, CD36, LDLR, SH3KBP1, ITSN1, MYH10, SGCB	229	272	13588	1.74518	1	0.826364	95.6506
GOTERM_BP_FAT		GO:0006897~endocytosis	6	1.85185	0.210177	CORO1C, DAB2, CD36, LDLR, SH3KBP1, ITSN1	229	188	13588	1.89371	1	0.863439	97.9273
GOTERM_BP_FAT		GO:0010324~membrane invagination	6	1.85185	0.210177	CORO1C, DAB2, CD36, LDLR, SH3KBP1, ITSN1	229	188	13588	1.89371	1	0.863439	97.9273
GOTERM_BP_FAT		GO:0016192~vesicle-mediated transport	10	3.08642	0.381579	CORO1C, DAB2, CD36, LDLR, TRIM9, GSN, STX17, SH3KBP1, ITSN1, MYH10	229	466	13588	1.27331	1	0.963774	99.9628
Annotation Cluster 29		Enrichment Score: 0.6091940876237428
Category		Term	Count	%	PValue	Genes	List Total	Pop Hits	Pop Total	Fold Enrichment	Bonferroni	Benjamini	FDR
GOTERM_BP_FAT	Kinase / phosphatase activity and intracellular signalling cascades	GO:0010627~regulation of protein kinase cascade	6	1.85185	0.11986	IGF1R, NF2, NUP62, ZEB2, ITSN1, APC	229	155	13588	2.29689	1	0.728141	87.7241
GOTERM_BP_FAT		GO:0010647~positive regulation of cell communication	6	1.85185	0.212801	IGF1R, ECE1, NUP62, ZEB2, LGI1, ITSN1	229	189	13588	1.88369	1	0.86391	98.0375
GOTERM_BP_FAT		GO:0009967~positive regulation of signal transduction	5	1.54321	0.328784	IGF1R, ECE1, NUP62, ZEB2, ITSN1	229	172	13588	1.72489	1	0.942344	99.8569
GOTERM_BP_FAT		GO:0010740~positive regulation of protein kinase cascade	3	0.925926	0.436179	IGF1R, NUP62, ITSN1	229	88	13588	2.02283	1	0.976854	99.9918
Annotation Cluster 30		Enrichment Score: 0.5549664868772061
Category		Term	Count	%	PValue	Genes	List Total	Pop Hits	Pop Total	Fold Enrichment	Bonferroni	Benjamini	FDR
GOTERM_BP_FAT	Skin development	GO:0043588~skin development	3	0.925926	0.0897626	NGFR, COL5A2, APC	229	30	13588	5.93362	1	0.65442	78.6714
GOTERM_BP_FAT		GO:0007398~ectoderm development	4	1.23457	0.386571	NF2, NGFR, COL5A2, APC	229	133	13588	1.78455	1	0.96516	99.9674
GOTERM_BP_FAT		GO:0008544~epidermis development	3	0.925926	0.623413	NGFR, COL5A2, APC	229	125	13588	1.42407	1	0.9957	100
Annotation Cluster 31		Enrichment Score: 0.4313290851767988
Category		Term	Count	%	PValue	Genes	List Total	Pop Hits	Pop Total	Fold Enrichment	Bonferroni	Benjamini	FDR
GOTERM_BP_FAT	Embryonic development	GO:0043009~chordate embryonic development	10	3.08642	0.276242	DLC1, SOX10, DAB2, ECE1, SFRP1, EPAS1, PBX1, ZEB2, MYH10, ADD1	229	421	13588	1.40941	1	0.916496	99.5065
GOTERM_BP_FAT		GO:0009792~embryonic development ending in birth or egg hatching	10	3.08642	0.27917	DLC1, SOX10, DAB2, ECE1, SFRP1, EPAS1, PBX1, ZEB2, MYH10, ADD1	229	425	13588	1.39615	1	0.916762	99.5383
GOTERM_BP_FAT		GO:0001701~in utero embryonic development	5	1.54321	0.658953	SOX10, DAB2, EPAS1, MYH10, ADD1	229	267	13588	1.11117	1	0.997078	100
Annotation Cluster 32		Enrichment Score: 0.4128782481426542
Category		Term	Count	%	PValue	Genes	List Total	Pop Hits	Pop Total	Fold Enrichment	Bonferroni	Benjamini	FDR
GOTERM_BP_FAT	RNA processing	GO:0016071~mRNA metabolic process	8	2.46914	0.244506	FIP1L1, DDX46, HNRNPD, SLU7, PRPF3, CDC5L, RBM25, SFRS12	229	302	13588	1.57182	1	0.892299	99.0012
GOTERM_BP_FAT		GO:0006397~mRNA processing	7	2.16049	0.277844	FIP1L1, DDX46, SLU7, PRPF3, CDC5L, RBM25, SFRS12	229	262	13588	1.58532	1	0.916751	99.5241
GOTERM_BP_FAT		GO:0008380~RNA splicing	5	1.54321	0.43996	DDX46, SLU7, PRPF3, CDC5L, SFRS12	229	201	13588	1.47603	1	0.977448	99.9927
GOTERM_BP_FAT		GO:0006396~RNA processing	7	2.16049	0.746418	FIP1L1, DDX46, SLU7, PRPF3, CDC5L, RBM25, SFRS12	229	437	13588	0.950466	1	0.999038	100
Annotation Cluster 33		Enrichment Score: 0.3297945377346616
Category		Term	Count	%	PValue	Genes	List Total	Pop Hits	Pop Total	Fold Enrichment	Bonferroni	Benjamini	FDR
GOTERM_BP_FAT	Haematopoietic development and immune system regulation	GO:0048538~thymus development	3	0.925926	0.0519631	BCL11B, PBX1, APC	229	22	13588	8.09131	1	0.528586	58.3833
GOTERM_BP_FAT		GO:0030217~T cell differentiation	3	0.925926	0.365467	BCL11B, WWP1, APC	229	76	13588	2.34222	1	0.958776	99.9432
GOTERM_BP_FAT		GO:0002520~immune system development	7	2.16049	0.373933	EPAS1, FOXJ1, BCL11B, WWP1, PBX1, APC, ADD1	229	295	13588	1.40798	1	0.961209	99.9544
GOTERM_BP_FAT		GO:0030097~hemopoiesis	6	1.85185	0.413649	EPAS1, BCL11B, WWP1, PBX1, APC, ADD1	229	251	13588	1.4184	1	0.971059	99.9845
GOTERM_BP_FAT		GO:0048534~hemopoietic or lymphoid organ development	6	1.85185	0.510509	EPAS1, BCL11B, WWP1, PBX1, APC, ADD1	229	281	13588	1.26697	1	0.988429	99.9992
GOTERM_BP_FAT		GO:0030098~lymphocyte differentiation	3	0.925926	0.573153	BCL11B, WWP1, APC	229	114	13588	1.56148	1	0.993513	99.9999
GOTERM_BP_FAT		GO:0042110~T cell activation	3	0.925926	0.582641	BCL11B, WWP1, APC	229	116	13588	1.53456	1	0.994063	99.9999
GOTERM_BP_FAT		GO:0002521~leukocyte differentiation	3	0.925926	0.691929	BCL11B, WWP1, APC	229	142	13588	1.25358	1	0.998	100
GOTERM_BP_FAT		GO:0046649~lymphocyte activation	3	0.925926	0.833862	BCL11B, WWP1, APC	229	191	13588	0.931983	1	0.999812	100
GOTERM_BP_FAT		GO:0045321~leukocyte activation	3	0.925926	0.88556	BCL11B, WWP1, APC	229	219	13588	0.812825	1	0.999963	100
GOTERM_BP_FAT		GO:0001775~cell activation	3	0.925926	0.920961	BCL11B, WWP1, APC	229	246	13588	0.723613	1	0.999992	100
Annotation Cluster 34		Enrichment Score: 0.29723277184185903
Category		Term	Count	%	PValue	Genes	List Total	Pop Hits	Pop Total	Fold Enrichment	Bonferroni	Benjamini	FDR
GOTERM_BP_FAT	Homeostasis and ion transport	GO:0050801~ion homeostasis	8	2.46914	0.222652	PLP1, S1PR1, JPH2, GNAQ, HEXA, GRIK3, TRIM24, MBP	229	293	13588	1.6201	1	0.874331	98.4043
GOTERM_BP_FAT		GO:0055074~calcium ion homeostasis	3	0.925926	0.475435	S1PR1, JPH2, TRIM24	229	95	13588	1.87378	1	0.984088	99.9975
GOTERM_BP_FAT		GO:0055065~metal ion homeostasis	3	0.925926	0.533657	S1PR1, JPH2, TRIM24	229	106	13588	1.67933	1	0.990489	99.9996
GOTERM_BP_FAT		GO:0055066~di-, tri-valent inorganic cation homeostasis	3	0.925926	0.706483	S1PR1, JPH2, TRIM24	229	146	13588	1.21924	1	0.99829	100
GOTERM_BP_FAT		GO:0055080~cation homeostasis	3	0.925926	0.818003	S1PR1, JPH2, TRIM24	229	184	13588	0.967439	1	0.999726	100
Annotation Cluster 35		Enrichment Score: 0.24919449005702082
Category		Term	Count	%	PValue	Genes	List Total	Pop Hits	Pop Total	Fold Enrichment	Bonferroni	Benjamini	FDR
GOTERM_BP_FAT	Kinase / phosphatase activity and intracellular signalling cascades	GO:0006468~protein amino acid phosphorylation	12	3.7037	0.515651	PRKCQ, IGF1R, BCR, FLT1, SPNB2, TEK, PTPRA, STK39, TRIM24, EIF2AK2, CDKL2, DCLK1	229	640	13588	1.11255	1	0.988942	99.9993
GOTERM_BP_FAT		GO:0016310~phosphorylation	13	4.01235	0.548085	BCR, FLT1, PTPRA, TRIM24, CDKL2, IGF1R, PRKCQ, SPNB2, ATP6V1E1, TEK, STK39, EIF2AK2, DCLK1	229	718	13588	1.07433	1	0.99163	99.9998
GOTERM_BP_FAT		GO:0006796~phosphate metabolic process	15	4.62963	0.597048	PTPRB, BCR, FLT1, PTPRA, PTPN13, TRIM24, CDKL2, IGF1R, PRKCQ, SPNB2, ATP6V1E1, TEK, STK39, EIF2AK2, DCLK1	229	866	13588	1.02776	1	0.994477	100
GOTERM_BP_FAT		GO:0006793~phosphorus metabolic process	15	4.62963	0.597048	PTPRB, BCR, FLT1, PTPRA, PTPN13, TRIM24, CDKL2, IGF1R, PRKCQ, SPNB2, ATP6V1E1, TEK, STK39, EIF2AK2, DCLK1	229	866	13588	1.02776	1	0.994477	100
Annotation Cluster 36		Enrichment Score: 0.2458683660166064
Category		Term	Count	%	PValue	Genes	List Total	Pop Hits	Pop Total	Fold Enrichment	Bonferroni	Benjamini	FDR
GOTERM_BP_FAT	Apoptosis	GO:0043066~negative regulation of apoptosis	6	1.85185	0.373262	SPHK2, NUP62, BCL11B, GLO1, ITSN1, APC	229	239	13588	1.48961	1	0.961561	99.9536
GOTERM_BP_FAT		GO:0043069~negative regulation of programmed cell death	6	1.85185	0.389749	SPHK2, NUP62, BCL11B, GLO1, ITSN1, APC	229	244	13588	1.45909	1	0.965227	99.9701
GOTERM_BP_FAT		GO:0060548~negative regulation of cell death	6	1.85185	0.394112	SPHK2, NUP62, BCL11B, GLO1, ITSN1, APC	229	245	13588	1.45313	1	0.966319	99.9734
GOTERM_BP_FAT		GO:0042981~regulation of apoptosis	10	3.08642	0.585262	COL18A1, AIFM2, SPHK2, NUP62, IFT57, BCL11B, GLO1, NGFR, ITSN1, APC	229	553	13588	1.07299	1	0.994151	99.9999
GOTERM_BP_FAT		GO:0043067~regulation of programmed cell death	10	3.08642	0.600486	COL18A1, AIFM2, SPHK2, NUP62, IFT57, BCL11B, GLO1, NGFR, ITSN1, APC	229	560	13588	1.05958	1	0.994507	100
GOTERM_BP_FAT		GO:0010941~regulation of cell death	10	3.08642	0.606929	COL18A1, AIFM2, SPHK2, NUP62, IFT57, BCL11B, GLO1, NGFR, ITSN1, APC	229	563	13588	1.05393	1	0.99488	100
GOTERM_BP_FAT		GO:0043065~positive regulation of apoptosis	4	1.23457	0.789726	COL18A1, AIFM2, NGFR, APC	229	248	13588	0.957036	1	0.999545	100
GOTERM_BP_FAT		GO:0043068~positive regulation of programmed cell death	4	1.23457	0.794226	COL18A1, AIFM2, NGFR, APC	229	250	13588	0.94938	1	0.99958	100
GOTERM_BP_FAT		GO:0010942~positive regulation of cell death	4	1.23457	0.798646	COL18A1, AIFM2, NGFR, APC	229	252	13588	0.941845	1	0.999589	100
Annotation Cluster 37		Enrichment Score: 0.22503419087925466
Category		Term	Count	%	PValue	Genes	List Total	Pop Hits	Pop Total	Fold Enrichment	Bonferroni	Benjamini	FDR
GOTERM_BP_FAT	Haematopoietic development and immune system regulation	GO:0044093~positive regulation of molecular function	8	2.46914	0.250196	PRKCQ, S1PR1, SPHK2, GNAQ, FOXJ1, IFT57, ZEB2, THY1	229	306	13588	1.55127	1	0.895876	99.1178
GOTERM_BP_FAT		GO:0050863~regulation of T cell activation	3	0.925926	0.543761	PRKCQ, FOXJ1, THY1	229	108	13588	1.64823	1	0.991319	99.9997
GOTERM_BP_FAT		GO:0051249~regulation of lymphocyte activation	3	0.925926	0.699279	PRKCQ, FOXJ1, THY1	229	144	13588	1.23617	1	0.998151	100
GOTERM_BP_FAT		GO:0002694~regulation of leukocyte activation	3	0.925926	0.733878	PRKCQ, FOXJ1, THY1	229	154	13588	1.1559	1	0.998861	100
GOTERM_BP_FAT		GO:0050865~regulation of cell activation	3	0.925926	0.74038	PRKCQ, FOXJ1, THY1	229	156	13588	1.14108	1	0.99897	100
GOTERM_BP_FAT		GO:0002684~positive regulation of immune system process	3	0.925926	0.863729	PRKCQ, FOXJ1, THY1	229	206	13588	0.86412	1	0.99992	100
Annotation Cluster 38		Enrichment Score: 0.2039194228910333
Category		Term	Count	%	PValue	Genes	List Total	Pop Hits	Pop Total	Fold Enrichment	Bonferroni	Benjamini	FDR
GOTERM_BP_FAT	Protein transport and localisation	GO:0006605~protein targeting	4	1.23457	0.386571	SPNB2, TRAK1, AKAP12, TPR	229	133	13588	1.78455	1	0.96516	99.9674
GOTERM_BP_FAT		GO:0046907~intracellular transport	8	2.46914	0.588593	STX17, SPNB2, TRAK1, AKAP12, WIPF1, TPR, DST, MYH10	229	431	13588	1.10137	1	0.994296	100
GOTERM_BP_FAT		GO:0008104~protein localization	13	4.01235	0.615265	FAM125B, SNX18, MYO1C, AKAP12, CD36, NUP62, SPNB2, STX17, TRAK1, PDCD6IP, TPR, AKAP2, TNRC6A	229	753	13588	1.0244	1	0.995259	100
GOTERM_BP_FAT		GO:0015031~protein transport	11	3.39506	0.658125	FAM125B, SNX18, CD36, NUP62, MYO1C, STX17, SPNB2, TRAK1, AKAP12, PDCD6IP, TPR	229	651	13588	1.00261	1	0.997107	100
GOTERM_BP_FAT		GO:0045184~establishment of protein localization	11	3.39506	0.667526	FAM125B, SNX18, CD36, NUP62, MYO1C, STX17, SPNB2, TRAK1, AKAP12, PDCD6IP, TPR	229	656	13588	0.994968	1	0.997269	100
GOTERM_BP_FAT		GO:0006886~intracellular protein transport	5	1.54321	0.684262	STX17, SPNB2, TRAK1, AKAP12, TPR	229	276	13588	1.07493	1	0.997828	100
GOTERM_BP_FAT		GO:0034613~cellular protein localization	5	1.54321	0.742856	STX17, SPNB2, TRAK1, AKAP12, TPR	229	299	13588	0.992245	1	0.998994	100
GOTERM_BP_FAT		GO:0070727~cellular macromolecule localization	5	1.54321	0.74754	STX17, SPNB2, TRAK1, AKAP12, TPR	229	301	13588	0.985652	1	0.999035	100
Annotation Cluster 39		Enrichment Score: 0.10641595242114356
Category		Term	Count	%	PValue	Genes	List Total	Pop Hits	Pop Total	Fold Enrichment	Bonferroni	Benjamini	FDR
GOTERM_BP_FAT	Apoptosis	GO:0008219~cell death	8	2.46914	0.751904	PRUNE2, ECE1, NUP62, IFT57, SH3KBP1, PDCD6IP, NGFR, EIF2AK2	229	507	13588	0.936272	1	0.99907	100
GOTERM_BP_FAT		GO:0016265~death	8	2.46914	0.772922	PRUNE2, ECE1, NUP62, IFT57, SH3KBP1, PDCD6IP, NGFR, EIF2AK2	229	519	13588	0.914624	1	0.99937	100
GOTERM_BP_FAT		GO:0006915~apoptosis	7	2.16049	0.797104	PRUNE2, ECE1, IFT57, SH3KBP1, PDCD6IP, NGFR, EIF2AK2	229	465	13588	0.893234	1	0.999585	100
GOTERM_BP_FAT		GO:0012501~programmed cell death	7	2.16049	0.810071	PRUNE2, ECE1, IFT57, SH3KBP1, PDCD6IP, NGFR, EIF2AK2	229	473	13588	0.878126	1	0.999682	100
Annotation Cluster 40		Enrichment Score: 0.07483424111814693
Category		Term	Count	%	PValue	Genes	List Total	Pop Hits	Pop Total	Fold Enrichment	Bonferroni	Benjamini	FDR
GOTERM_BP_FAT	Chromatin regulation	GO:0051276~chromosome organization	7	2.16049	0.675852	AIFM2, BPTF, PARP4, BCOR, SMC2, CHD4, APC	229	404	13588	1.0281	1	0.99756	100
GOTERM_BP_FAT		GO:0016568~chromatin modification	3	0.925926	0.909248	BPTF, BCOR, CHD4	229	236	13588	0.754274	1	0.999986	100
GOTERM_BP_FAT		GO:0006325~chromatin organization	3	0.925926	0.970427	BPTF, BCOR, CHD4	229	315	13588	0.565107	1	1	100
Annotation Cluster 41		Enrichment Score: 0.012187766650797311
Category		Term	Count	%	PValue	Genes	List Total	Pop Hits	Pop Total	Fold Enrichment	Bonferroni	Benjamini	FDR
GOTERM_BP_FAT	Proteolysis and catabolism	GO:0006508~proteolysis	13	4.01235	0.93625	PLAT, AEBP1, METAP2, PAMR1, MME, MMP23, PRKCQ, PJA1, ECE1, WWP1, NEDD4L, ADAM12, SPOP	229	1034	13588	0.746007	1	0.999996	100
GOTERM_BP_FAT		GO:0044265~cellular macromolecule catabolic process	7	2.16049	0.946145	PJA1, PRKCQ, CD36, LDLR, WWP1, NEDD4L, SPOP	229	609	13588	0.682026	1	0.999998	100
GOTERM_BP_FAT		GO:0009057~macromolecule catabolic process	7	2.16049	0.966217	PJA1, PRKCQ, CD36, LDLR, WWP1, NEDD4L, SPOP	229	654	13588	0.635097	1	1	100
GOTERM_BP_FAT		GO:0051603~proteolysis involved in cellular protein catabolic process	5	1.54321	0.980676	PJA1, PRKCQ, WWP1, NEDD4L, SPOP	229	534	13588	0.555583	1	1	100
GOTERM_BP_FAT		GO:0044257~cellular protein catabolic process	5	1.54321	0.981384	PJA1, PRKCQ, WWP1, NEDD4L, SPOP	229	537	13588	0.552479	1	1	100
GOTERM_BP_FAT		GO:0030163~protein catabolic process	5	1.54321	0.985331	PJA1, PRKCQ, WWP1, NEDD4L, SPOP	229	556	13588	0.533599	1	1	100
GOTERM_BP_FAT		GO:0043632~modification-dependent macromolecule catabolic process	4	1.23457	0.992118	PJA1, WWP1, NEDD4L, SPOP	229	508	13588	0.467215	1	1	100
GOTERM_BP_FAT		GO:0019941~modification-dependent protein catabolic process	4	1.23457	0.992118	PJA1, WWP1, NEDD4L, SPOP	229	508	13588	0.467215	1	1	100
Annotation Cluster 42		Enrichment Score: 0.008649641589323385
Category		Term	Count	%	PValue	Genes	List Total	Pop Hits	Pop Total	Fold Enrichment	Bonferroni	Benjamini	FDR
GOTERM_BP_FAT	Reproduction	GO:0019953~sexual reproduction	4	1.23457	0.959448	HEXA, ZFP148, MTAP7, DIAP2	229	386	13588	0.614883	1	0.999999	100
GOTERM_BP_FAT		GO:0007276~gamete generation	3	0.925926	0.976603	ZFP148, MTAP7, DIAP2	229	331	13588	0.537791	1	1	100
GOTERM_BP_FAT		GO:0048609~reproductive process in a multicellular organism	3	0.925926	0.992729	ZFP148, MTAP7, DIAP2	229	409	13588	0.435229	1	1	100
GOTERM_BP_FAT		GO:0032504~multicellular organism reproduction	3	0.925926	0.992729	ZFP148, MTAP7, DIAP2	229	409	13588	0.435229	1	1	100
Annotation Cluster 43		Enrichment Score: 0.005153664674511013
Category		Term	Count	%	PValue	Genes	List Total	Pop Hits	Pop Total	Fold Enrichment	Bonferroni	Benjamini	FDR
GOTERM_BP_FAT	Homeostasis and ion transport	GO:0006812~cation transport	5	1.54321	0.975572	SLC44A1, ATP6V1E1, KCNA1, SLC39A8, NFATC1	229	515	13588	0.57608	1	1	100
GOTERM_BP_FAT		GO:0006811~ion transport	6	1.85185	0.993546	SLC44A1, GRIK3, ATP6V1E1, KCNA1, SLC39A8, NFATC1	229	712	13588	0.500025	1	1	100
GOTERM_BP_FAT		GO:0030001~metal ion transport	3	0.925926	0.995616	KCNA1, SLC39A8, NFATC1	229	442	13588	0.402735	1	1	100

## Sheet: Metaclusters
GO Bioprocess Metacluster	Count	Gene Symbols
Transcription and transcriptional regulation	68	AEBP1; AFF3; ANKRD1; ANP32A; APC; ATRX; BCL11B; BCOR; BPTF; CAMTA1; CDC5L; CENPB; CHD4; DBP; DNAJB5; DNAJC2; DNTTIP2; EBF3; ELK3; EPAS1; ERG; ESF1; EWSR1; FABP4; FOXJ1; GTF2F1; HNRNPD; IFT57; KLF12; LRRFIP1; MLLT3; MTF1; MYBL1; NAA15; NFATC1; NFATC2; NFIC; NFIX; NKAP; NR1D1; NR2F2; NUP62; PBX1; PER2; POLR3K; PRKCQ; PROX1; RFC1; RUNX2; S1PR1; SAMD4; SOX10; TCF4; THAP7; TNRC6A; TRAK1; TRIM24; TSHZ2…
Kinase / phosphatase activity and intracellular signalling cascades	48	AKAP2; APC; ARAP3; ARRB2; ATP6V1E1; BCR; CDKL2; DCLK1; EIF2AK2; FABP4; FLT1; FOXJ1; GFRA1; GFRA2; GNAQ; GPR116; GRIK3; HTR1D; IGF1R; ITSN1; LGI1; LGR5; NF2; NGFR; NUP62; OXTR; PDAP1; PLAT; PLP1; PPP1R14A; PRKCQ; PTPN13; PTPRA; PTPRB; RGS16; RUNX2; S1PR1; SFRP1; SPHK2; SPNB2; SPNB2; STK39; TEK; THY1; TRIM24; ZEB2; ZFP462
Cell adhesion	27	ADAM12; AEBP1; CD36; CD93; CDH13; CDH5; CHL1; CLDN5; CNTN2; COL12A1; COL15A1; COL18A1; COL6A1; COL6A2; DLC1; DST; EMCN; IGFBP7; LGALS1; NRP2; PCDH7; PECAM1; POSTN; SDK1; TEK; THY1; TNC
Cytoskeletal organisation	26	AKAP2; APC; ARHGEF17; CLASP1; CORO1C; DAAM2; DIAP2; DLC1; DST; FOXJ1; GSN; KANK2; LIMCH1; MAPRE1; MTAP1B; MTAP4; MTAP7; MYH10; MYH11; NEXN; PROX1; S1PR1; SGCB;SPNB2; THY1; WIPF1
Cell migration	22	APC; ARAP3; ARHGAP5; CHL1; CNTN2; COL18A1; DCLK1; FLT1; FOXJ1; MYH10; NEXN; NGFR; NR2F2; NRP2; NUP62; PECAM1; PLAT; S1PR1; TEK; THY1; TNS1; ZEB2
Neural morphogenesis and axon guidance	21	ADD1; APC; BCL11B; CHL1; COL18A1; DAB2; DCLK1; DST; FOXJ1; GNAQ; MTAP1B; MTAP7; MYH10; MYH11; NFATC1; NGFR; NOX4; NTN4;PROX1; S1PR1; THY1
Homeostasis and ion transport	19	ADD1; APC; ATP6V1E1; EPAS1; GNAQ; GRIK3; GRIK3; HEXA; JPH2; KCNA1; MBP; NFATC1; NOX4; PARP4; PLP1; S1PR1; SLC39A8; SLC44A1; TRIM24
Tissue morphogenesis	18	APC; ARHGAP5; COL18A1; DLC1; FLT1; GNAQ; IGF1R; MTAP7; NF2; NGFR; OSR1; PBX1; PROX1; S1PR1; SFRP1; TNC; WWP1; ZEB2
Regulation of neuron function	17	ADD1; APC; EPAS1; FABP4; GNAQ; GRIK3; HEXA; JPH2; LDLR; MBP; MTAP7; NOX4; PARP4; PLP1; S1PR1; TRIM24; TRIM9
Protein transport and localisation	16	AKAP12; AKAP2; CD36; DST; FAM125B; MYH10; MYO1C; NUP62; PDCD6IP; SNX18; SPNB2; STX17; TNRC6A; TPR; TRAK1; WIPF1
Apoptosis	15	AIFM2; APC; BCL11B; COL18A1; ECE1; EIF2AK2; GLO1; IFT57; ITSN1; NGFR; NUP62; PDCD6IP; PRUNE2; SH3KBP1; SPHK2
Proteolysis and catabolism	15	ADAM12; AEBP1; CD36; ECE1; LDLR; METAP2; MME; MMP23; NEDD4L; PAMR1; PJA1; PLAT; PRKCQ; SPOP; WWP1
Regulation of cell division / cell cycle	15	APC; CCND2; CDC5L; CLASP1; DNAJC2; DST; INCENP; MAPRE1; MTAP1B; MTAP4; MYH10; NFATC1; PDCD6IP; PSMC3IP; SMC2
Haematopoietic development and immune system regulation	14	ADD1; APC; BCL11B; EPAS1; FOXJ1; GNAQ; IFT57; PBX1; PRKCQ; S1PR1; SPHK2; THY1; WWP1; ZEB2
Ras/Rho signal transduction and GTPase activity	13	ARAP3; FOXJ1; GNAQ; IFT57; IQGAP1; ITSN1; PRKCQ; S1PR1; SPHK2; THY1; ARHGEF17; BCR; NUP62
Angiogenesis	12	CDH5; COL18A1; ELK3; EMCN; EPAS1; FLT1; NAA15; NR2F2; PROX1; S1PR1; SPHK2; THY1
Protein complex assembly	12	APC; DIAP2; GSN; GTF2F1; IGF1R; MYH11; OLFM1; SCUBE3; SLU7; STOM; TRIM24; TUBB2B
Membrane and vesicle function	11	CD36; ;CORO1C; DAB2; GSN; ITSN1; LDLR; MYH10; SGCB; SH3KBP1; STX17; TRIM9
Embryonic development	10	ADD1; DAB2; DLC1; ECE1; EPAS1; MYH10; PBX1; SFRP1; SOX10; ZEB2
Developmental pattern formation	8	APC; FLT1; FOXJ1; MLLT3; NR2F2; PBX1; SFRP1; ZEB2
Muscle structure, development and differentiation	8	LGALS1; LIMCH1; MYH10; MYH11; NR2F2; PROX1; TNC; ZFHX3
Regulation of cell division / cell cycle	8	APC; CCND2; CLASP1; DNAJC2; INCENP; MAPRE1; NFATC1; SMC2
RNA processing	8	CDC5L; DDX46; FIP1L1; HNRNPD; PRPF3; RBM25; SFRS12; SLU7
Chromatin regulation	7	AIFM2; APC; BCOR; BPTF; CHD4; PARP4; SMC2
Eye development	5	APC; BCL11B; MYH10; PROX1; THY1
Cell junctions	4	DLC1; NF; THY1; TNS1
Reproduction	4	DIAP2; HEXA; MTAP7; ZFP148
Skin development	4	APC; COL5A2; NF2; NGFR
Mesenchymal cell development	3	NFATC1; NRP2; ZEB2

## Sheet: DAVID KEGG Pathway
Category	Term	Count	%	PValue	Genes	List Total	Pop Hits	Pop Total	Fold Enrichment	Bonferroni	Benjamini	FDR
KEGG_PATHWAY	mmu04144:Endocytosis	11	3.39506	0.000878737	FAM125B, IGF1R, DAB2, FLT1, ARRB2, LDLR, WWP1, SH3KBP1, NEDD4L, PDCD6IP, ARAP3	88	202	5738	3.55074	0.073632	0.073632	0.945621
KEGG_PATHWAY	mmu04670:Leukocyte transendothelial migration	7	2.16049	0.00903543	ARHGAP5, CLDN5, PECAM1, MSN, JAM2, CDH5, THY1	88	119	5738	3.83556	0.545999	0.326204	9.34373
KEGG_PATHWAY	mmu04270:Vascular smooth muscle contraction	7	2.16049	0.00939773	PRKCQ, ACTG2, GNAQ, PPP1R12B, MYH11, PLCB1, PPP1R14A	88	120	5738	3.8036	0.560215	0.239533	9.70129
KEGG_PATHWAY	mmu04310:Wnt signaling pathway	7	2.16049	0.0249767	SFRP1, CCND2, NFATC2, PLCB1, DAAM2, APC, NFATC1	88	149	5738	3.0633	0.88926	0.423133	23.9186
KEGG_PATHWAY	mmu04510:Focal adhesion	8	2.46914	0.029883	IGF1R, FLT1, ARHGAP5, CCND2, TNC, COL6A2, COL6A1, COL5A2	88	198	5738	2.63453	0.9286	0.410153	27.9556
KEGG_PATHWAY	mmu04512:ECM-receptor interaction	5	1.54321	0.0366261	CD36, TNC, COL6A2, COL6A1, COL5A2	88	83	5738	3.92798	0.961082	0.417862	33.1869
KEGG_PATHWAY	mmu03040:Spliceosome	6	1.85185	0.0393865	DDX46, ZMAT2, SLU7, PRPF3, CDC5L, RBM25	88	124	5738	3.15506	0.96968	0.393117	35.2271
KEGG_PATHWAY	mmu04360:Axon guidance	6	1.85185	0.0480012	SEMA3G, NTN4, SEMA3B, DPYSL2, NFATC2, NFATC1	88	131	5738	2.98647	0.986153	0.414306	41.2361
KEGG_PATHWAY	mmu04530:Tight junction	6	1.85185	0.0533902	PRKCQ, SPNB2, CLDN5, MYH11, JAM2, MYH10	88	135	5738	2.89798	0.99155	0.411626	44.733

## Sheet: ROCK Pathway
Index	Provider	Description	p-value	Pathway-Coverage	Matched-Genes-In-Pathway	Pathway-Link
1	Reactome	Apoptotic cleavage of cellular proteins	0.000144	7/33=21%	APC;GSN;DSP;PLEC;PRKCQ;ADD1;VIM;	http://www.reactome.org/cgi-bin/eventbrowser_st_id?ST_ID=REACT_107
2	Reactome	Axon guidance	0.00153	11/149=7%	NRP2;PTPRA;MSN;CNTN2;DPYSL2;DPYSL3;GFRA2;MYH11;CHL1;GFRA1;MYH10;	http://www.reactome.org/cgi-bin/eventbrowser_st_id?ST_ID=REACT_18266
3	Biocarta	PKC-catalyzed phosphorylation of inhibitory phosphoprotein of myosin phosphatase	0.00153	4/11=36%	PPP1R12B;ARHGAP5;GNAQ;PLCB1;	http://cgap.nci.nih.gov/Pathways/BioCarta/h_myosinPathway
4	KEGG	Protein digestion and absorption	0.00153	8/80=10%	COL6A2;COL6A1;MME;COL5A2;COL15A1;COL12A1;COL17A1;COL18A1;	http://www.genome.jp/dbget-bin/show_pathway?hsa04974
5	Reactome	Apoptotic execution phase	0.00153	6/40=15%	APC;DSP;PLEC;PRKCQ;ADD1;VIM;	http://www.reactome.org/cgi-bin/eventbrowser_st_id?ST_ID=REACT_995
6	KEGG	Cell Communication	0.00153	18/411=4%	IGF1R;IQGAP1;COL6A2;COL6A1;CCND2;JAM2;CLDN5;TUBB2B;TNC;COL5A2;ARHGAP5;FLT1;PTPRB;GNAQ;MYH11;PRKCQ;PLCB1;MYH10;	http://www.genome.ad.jp/kegg/pathway.html#cellular
7	NCI	Integrin family cell surface interactions	0.00156	10/137=7%	THY1;ADAM12;COL6A2;COL6A1;PTPRA;JAM2;TNC;COL5A2;PLAT;COL18A1;	http://pid.nci.nih.gov/search/pathway_landing.shtml?what=graphic&gif=on&;pathway_id=integrin_cs_pathway
8	Reactome	NCAM1 interactions	0.00192	6/44=13%	COL6A2;COL6A1;CNTN2;COL5A2;GFRA2;GFRA1;	http://www.reactome.org/cgi-bin/eventbrowser_st_id?ST_ID=REACT_18312
9	KEGG	Cellular Processes	0.00238	35/1232=2%	WWP1;APC;DAB2;IGF1R;ARRB2;IQGAP1;LDLR;FAM125B;COL6A2;COL6A1;ATP6V1E1;SH3KBP1;CCND2;MSN;JAM2;ARAP3;CLDN5;TUBB2B;TNC;GSN;COL5A2;HEXA;ACOX3;CD36;ARHGAP5;FLT1;PTPRB;NEDD4L;GNAQ;MYH11;PIP4K2A;PRKCQ;PLCB1;PDCD6IP;MYH10;	http://www.genome.ad.jp/kegg/pathway.html#cellular
10	KEGG	Endocytosis	0.00628	11/202=5%	WWP1;DAB2;IGF1R;ARRB2;LDLR;FAM125B;SH3KBP1;ARAP3;FLT1;NEDD4L;PDCD6IP;	http://www.genome.jp/dbget-bin/show_pathway?hsa04144
11	NCI	Beta1 integrin cell surface interactions	0.00824	6/60=10%	COL6A2;COL6A1;JAM2;TNC;COL5A2;COL18A1;	http://pid.nci.nih.gov/search/pathway_landing.shtml?what=graphic&gif=on&;pathway_id=integrin1_pathway
12	Reactome	Type I hemidesmosome assembly	0.0169	3/11=27%	PLEC;DST;COL17A1;	http://www.reactome.org/cgi-bin/eventbrowser_st_id?ST_ID=REACT_20537
13	Reactome	Cell junction organization	0.0239	7/104=6%	LIMS2;CLDN5;PLEC;CDH5;DST;COL17A1;CDH13;	http://www.reactome.org/cgi-bin/eventbrowser_st_id?ST_ID=REACT_20676
14	KEGG	Vascular smooth muscle contraction	0.0424	7/116=6%	PPP1R12B;PPP1R14A;ACTG2;GNAQ;MYH11;PRKCQ;PLCB1;	http://www.genome.jp/dbget-bin/show_pathway?hsa04270
15	Biocarta	CCR3 signaling in Eosinophils	0.0492	3/17=17%	PPP1R12B;GNAQ;PLCB1;	http://cgap.nci.nih.gov/Pathways/BioCarta/h_CCR3Pathway
16	Biocarta	Effects of calcineurin in Keratinocyte Differentiation	0.0492	3/17=17%	NFATC2;NFATC1;GNAQ;	http://cgap.nci.nih.gov/Pathways/BioCarta/h_calcineurinPathway
