# Supplementary material for: Mouse mammary stem cells express prognostic markers for triple-negative breast cancer
Source: Breast Cancer Res. 2015 Mar 4;17(1):31. doi: 10.1186/s13058-015-0539-6 (PMC4381533; doi:10.1186/s13058-015-0539-6)
Supplement: Additional file 10: — GO analysis of genes downregulated in MaSCs. [file 13058_2015_539_MOESM10_ESM.xlsx]

## Sheet: DAVID GO Analysis
Additional File 10 Downregulated MaSC genes signature analysis
Annotation Cluster 1	Metacluster	Enrichment Score: 2.0410600805068184
Category		Term	Count	%	PValue	Genes
GOTERM_BP_FAT	Haematopoietic development and immune system regulation	GO:0048534~hemopoietic or lymphoid organ development	5	5	0.00509486	ID2, PRDX2, PBX1, IFNZ, KIRREL3
GOTERM_BP_FAT		GO:0002520~immune system development	5	5	0.00604428	ID2, PRDX2, PBX1, IFNZ, KIRREL3
GOTERM_BP_FAT		GO:0030097~hemopoiesis	4	4	0.0244536	ID2, PBX1, IFNZ, KIRREL3
Annotation Cluster 2		Enrichment Score: 1.3123863881885562
Category		Term	Count	%	PValue	Genes
GOTERM_BP_FAT	Response to wounding	GO:0009611~response to wounding	5	5	0.0105931	SLC1A3, SAA1, PYCARD, PRDX2, TRIM72
GOTERM_BP_FAT		GO:0006952~defense response	4	4	0.100548	SAA1, PYCARD, PRDX2, IFNZ
GOTERM_BP_FAT		GO:0006954~inflammatory response	3	3	0.108504	SAA1, PYCARD, PRDX2
Annotation Cluster 3		Enrichment Score: 0.9102291328066455
Category		Term	Count	%	PValue	Genes
GOTERM_BP_FAT	Apoptosis	GO:0006915~apoptosis	4	4	0.109338	CYCS, PYCARD, IFNZ, IL24
GOTERM_BP_FAT		GO:0012501~programmed cell death	4	4	0.113578	CYCS, PYCARD, IFNZ, IL24
GOTERM_BP_FAT		GO:0008219~cell death	4	4	0.132292	CYCS, PYCARD, IFNZ, IL24
GOTERM_BP_FAT		GO:0016265~death	4	4	0.13915	CYCS, PYCARD, IFNZ, IL24
Annotation Cluster 4		Enrichment Score: 0.8303932149934439
Category		Term	Count	%	PValue	Genes
GOTERM_BP_FAT	Apoptosis	GO:0043065~positive regulation of apoptosis	3	3	0.127359	CYCS, PYCARD, DDIT3
GOTERM_BP_FAT		GO:0043068~positive regulation of programmed cell death	3	3	0.129035	CYCS, PYCARD, DDIT3
GOTERM_BP_FAT		GO:0010942~positive regulation of cell death	3	3	0.130717	CYCS, PYCARD, DDIT3
GOTERM_BP_FAT		GO:0043085~positive regulation of catalytic activity	3	3	0.138347	CYCS, PYCARD, PRDX2
GOTERM_BP_FAT		GO:0042981~regulation of apoptosis	4	4	0.159233	CYCS, PYCARD, PRDX2, DDIT3
GOTERM_BP_FAT		GO:0043067~regulation of programmed cell death	4	4	0.16348	CYCS, PYCARD, PRDX2, DDIT3
GOTERM_BP_FAT		GO:0010941~regulation of cell death	4	4	0.16531	CYCS, PYCARD, PRDX2, DDIT3
GOTERM_BP_FAT		GO:0044093~positive regulation of molecular function	3	3	0.177835	CYCS, PYCARD, PRDX2
Annotation Cluster 5		Enrichment Score: 0.5933764680183917
Category		Term	Count	%	PValue	Genes
GOTERM_BP_FAT	Transcription and transcriptional regulation	GO:0045449~regulation of transcription	10	10	0.0922425	ID2, SOX11, TRPS1, DLX4, PRDX2, PBX1, SETD8, TERF2IP, JMJD1C, DDIT3
GOTERM_BP_FAT		GO:0045935~positive regulation of nucleobase, nucleoside, nucleotide and nucleic acid metabolic process	4	4	0.133995	SOX11, GUCY1A3, PBX1, DDIT3
GOTERM_BP_FAT		GO:0051173~positive regulation of nitrogen compound metabolic process	4	4	0.143208	SOX11, GUCY1A3, PBX1, DDIT3
GOTERM_BP_FAT		GO:0031328~positive regulation of cellular biosynthetic process	4	4	0.158629	SOX11, GUCY1A3, PBX1, DDIT3
GOTERM_BP_FAT		GO:0009891~positive regulation of biosynthetic process	4	4	0.161655	SOX11, GUCY1A3, PBX1, DDIT3
GOTERM_BP_FAT		GO:0006355~regulation of transcription, DNA-dependent	6	6	0.302057	ID2, SOX11, TRPS1, DLX4, PBX1, DDIT3
GOTERM_BP_FAT		GO:0051252~regulation of RNA metabolic process	6	6	0.313752	ID2, SOX11, TRPS1, DLX4, PBX1, DDIT3
GOTERM_BP_FAT		GO:0045941~positive regulation of transcription	3	3	0.334494	SOX11, PBX1, DDIT3
GOTERM_BP_FAT		GO:0010628~positive regulation of gene expression	3	3	0.346497	SOX11, PBX1, DDIT3
GOTERM_BP_FAT		GO:0010557~positive regulation of macromolecule biosynthetic process	3	3	0.384819	SOX11, PBX1, DDIT3
GOTERM_BP_FAT		GO:0006357~regulation of transcription from RNA polymerase II promoter	3	3	0.460271	ID2, SOX11, PBX1
GOTERM_BP_FAT		GO:0006350~transcription	6	6	0.461093	SOX11, TRPS1, PBX1, SETD8, JMJD1C, DDIT3
GOTERM_BP_FAT		GO:0010604~positive regulation of macromolecule metabolic process	3	3	0.4746	SOX11, PBX1, DDIT3

## Sheet: Metaclusters
GO Bioprocess Metacluster	Count	Gene Symbols
Transcription and transcriptional regulation	11	ID2, GUCY1A3, SOX11, TRPS1, DLX4, PRDX2, PBX1, SETD8, TERF2IP, JMJD1C, DDIT3
Response to wounding	6	SLC1A3, SAA1, PYCARD, PRDX2, IFNZ, TRIM72
Apoptosis	6	CYCS, PYCARD, IFNZ, IL24, PRDX2, DDIT3
Haematopoietic development and immune system regulation	5	ID2, PRDX2, PBX1, IFNZ, KIRREL3

## Sheet: DAVID KEGG Pathway
There was no significant enrichment for any KEGG pathways in the top 100 MYO gene list.
