# Supplementary material for: Mouse mammary stem cells express prognostic markers for triple-negative breast cancer
Source: Springer Nature journal article supplement (doi:10.1186/s13058-015-0539-6), 2015-03-02

A

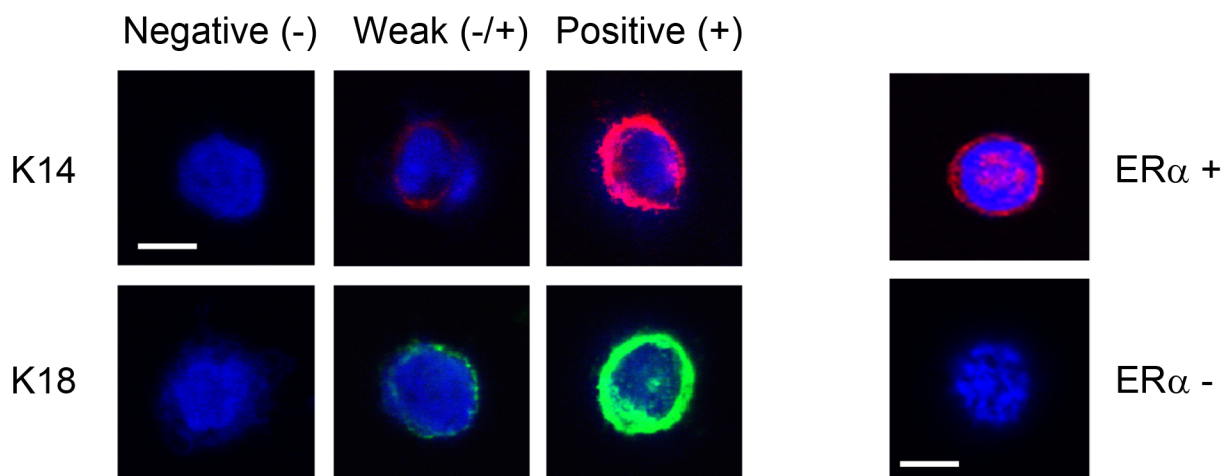

B

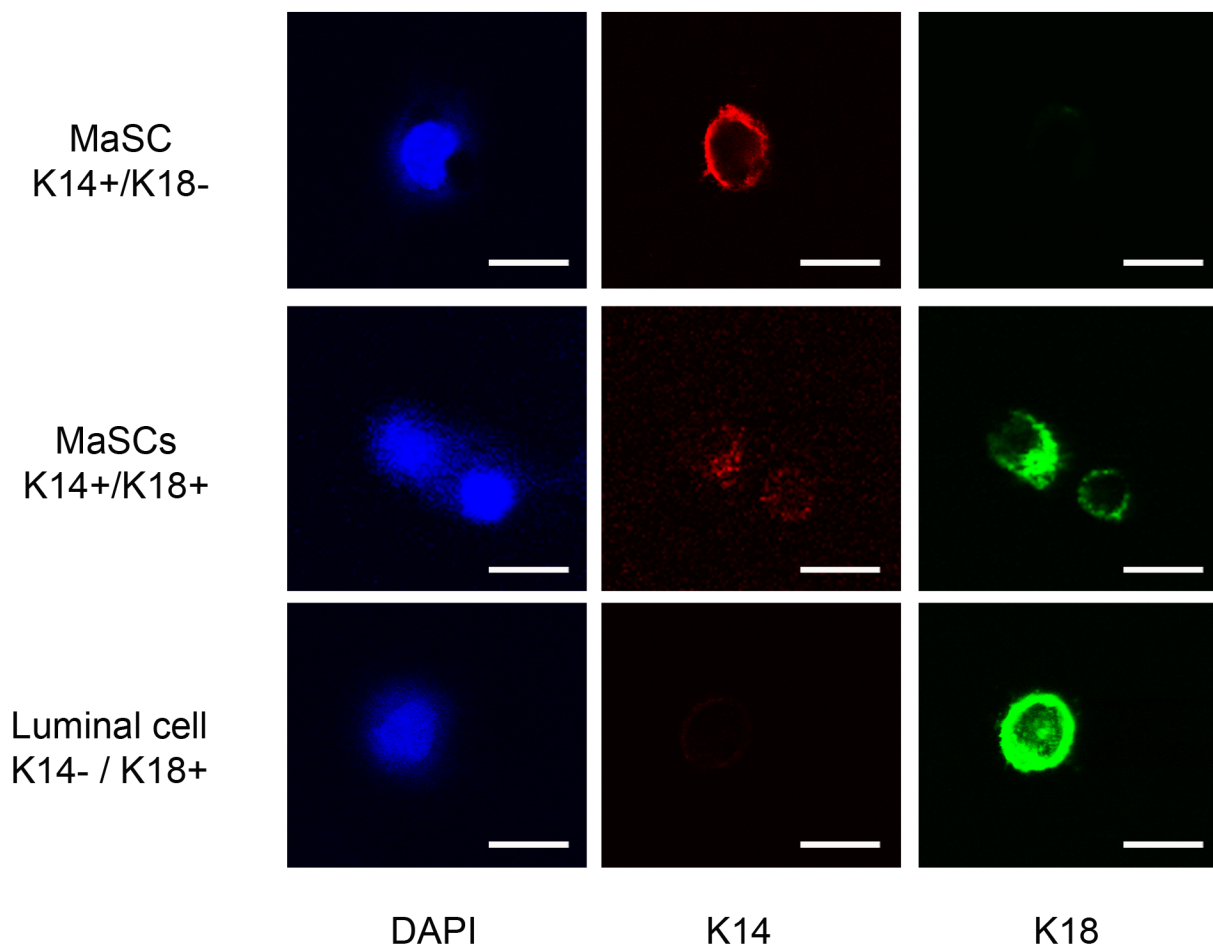

Supplement: MOESM5 [file 9781380]
